# Comorbid-phenome prediction and phenotype risk scores enhance gene discovery for generalized anxiety disorder and posttraumatic stress disorder

Frank R Wendt<sup>1,2,\*</sup>, Gita A Pathak<sup>1,2</sup>, Joseph D Deak<sup>1,2</sup>, Flavio De Angelis<sup>1,2</sup>, Dora Koller<sup>1,2</sup>, Brenda Cabrera-Mendoza<sup>1,2</sup>, Dannielle S Lebovitch<sup>3-6</sup>, Daniel F Levey<sup>1,2</sup>, Murray B Stein<sup>7-9</sup>, Henry R Kranzler<sup>10,11</sup>, Karestan C Koenen<sup>12-14</sup>, Joel Gelernter<sup>1,2,15,16</sup>, Laura M Huckins<sup>3-6,17,18</sup>, and Renato Polimanti<sup>1,2,\*</sup>

<sup>1</sup> Department of Psychiatry, Yale School of Medicine, New Haven, CT, USA

<sup>2</sup> VA CT Healthcare System, West Haven, CT, USA

<sup>3</sup> Pamela Sklar Division of Psychiatric Genomics, Icahn School of Medicine at Mount Sinai, New York, NY 10029, USA

<sup>4</sup> Department of Psychiatry, Icahn School of Medicine at Mount Sinai, New York, NY 10029, USA

<sup>5</sup> Department of Genetics and Genomics, Icahn School of Medicine at Mount Sinai, New York, NY 10029, USA

<sup>6</sup> Icahn Institute for Genomics and Multiscale Biology, Icahn School of Medicine at Mount Sinai, New York, NY 10029, USA

<sup>7</sup> VA San Diego Healthcare System, Psychiatry Service, San Diego, CA, USA

<sup>8</sup> Department of Psychiatry, University of California San Diego, La Jolla, CA, USA

<sup>9</sup>Herbert Wertheim School of Public Health and Human Longevity Science, University of California San Diego, La Jolla, CA, USA

<sup>10</sup>University of Pennsylvania Perelman School of Medicine, Philadelphia, PA, 19104, USA

<sup>11</sup>Mental Illness Research, Education, and Clinical Center, Crescenzo Veterans Affairs Medical Center, Philadelphia, PA, 19104, USA

<sup>12</sup>Broad Institute of MIT and Harvard, Stanley Center for Psychiatry Research, Cambridge, MA, USA

<sup>13</sup>Massachusetts General Hospital, Psychiatry and Neurodevelopmental Genetics Unit (PNGU), Boston, MA, USA

<sup>14</sup>Harvard School of Public Health, Department of Epidemiology, Boston, MA, USA

<sup>15</sup>Department of Genetics, Yale School of Medicine, New Haven, CT, USA

<sup>16</sup>Department of Neuroscience, Yale School of Medicine, New Haven, CT, USA

<sup>17</sup>Seaver Autism Center for Research and Treatment, Icahn School of Medicine at Mount Sinai, New York, NY 10029, USA

<sup>18</sup>Mental Illness Research, Education and Clinical Center, James J. Peters Department of Veterans Affairs Medical Center, Bronx, NY 10468, USA

\* Corresponding authors: Frank R Wendt ([frank.wendt@yale.edu](mailto:frank.wendt@yale.edu); ORCID: <https://orcid.org/0000-0002-2108-6822>) & Renato Polimanti ([renato.polimanti@yale.edu](mailto:renato.polimanti@yale.edu); ORCID: <https://orcid.org/0000-0003-0745-6046>)

## Abstract

UK Biobank (UKB) is a key contributor in mental health genome-wide association studies (GWAS) but only ~31% of participants completed the Mental Health Questionnaire (“MHQ responders”). We predicted generalized anxiety disorder (GAD), posttraumatic stress disorder (PTSD), and major depression symptoms using elastic net regression in the ~69% of UKB participants lacking MHQ data (“MHQ non-responders”;  $N_{\text{Training}}=50\%$ ;  $N_{\text{Test}}=50\%$ ), maximizing the informative sample for these traits. MHQ responders were more likely to be female, from higher socioeconomic positions, and less anxious than non-responders. Genetic correlation of GAD and PTSD between MHQ responders and non-responders ranged from 0.636-1.08; both were predicted by polygenic scores generated from independent cohorts. In meta-analyses of GAD ( $N=489,579$ ) and PTSD ( $N=497,803$ ), we discovered many novel genomic risk loci (13 for GAD and 40 for PTSD). Transcriptomic analyses converged on altered regulation of prenatal dorsolateral prefrontal cortex in these disorders.

1 Psychiatric disorders are highly polygenic; thousands of risk loci across the genome contribute to their  
2 liability. Because of this polygenicity, extremely large sample sizes are required to detect the small  
3 individual effects associated with risk alleles.<sup>1, 2, 3, 4, 5, 6</sup> Biobanks and consortia play a critical role in  
4 organizing, curating, and facilitating large genetic studies of mental health and psychopathology.<sup>7, 8, 9, 10</sup>  
5 The UK Biobank (UKB) represents a resource of homogeneously ascertained participants with detailed  
6 information related to physical health, anthropometric measurements, and sociodemographic  
7 characteristics, etc. A primary limitation of UKB for studying mental health is the limited availability of  
8 participant responses to voluntary mental health questions and surveys. Among the approximately  
9 502,000 UKB participants, only 31% completed the online Mental Health Questionnaire (herein termed  
10 “MHQ responders”).<sup>11</sup> These missing data impose an upper limit on the UKB sample that is available for  
11 genetic studies using direct information. Indeed, many studies have had only modest success with risk  
12 locus discovery when studying psychopathologies in the subset of MHQ responders.<sup>4, 12</sup>

13 We hypothesized that carefully selected features ascertained in the entire UKB could permit  
14 genetic studies of MHQ phenotypes in the UKB participants who did not complete the survey (herein  
15 termed “MHQ non-responders”).<sup>13</sup> We demonstrate the reliability of studying the collection of comorbid  
16 phenotypes, hereafter referred as a co-phenome,<sup>13</sup> using several independent methods. Here we  
17 maximized the use of unrelated individuals from the UKB – more than doubling the available sample size  
18 relative to only MHQ responders – for genome-wide association studies (GWAS) of generalized anxiety  
19 disorder (GAD) and posttraumatic stress disorder (PTSD) symptoms. In meta-analyses adjusted for the  
20 effects of the major co-phenome correlate and an important transdiagnostic feature of internalizing  
21 psychopathologies, *neuroticism*, we identified multi-omic and cross-phenotype contributions of genes  
22 expressed in the prenatal brain. Using these novel GAD and PTSD data, we report putative cross-  
23 phenotype drug repurposing targets and identify drugs that may induce adverse effects that resemble  
24 anxiety symptoms. Our results provide one roadmap by which sample size and statistical power may be

25 improved for gene discovery of incompletely ascertained traits in the UKB and other biobanks with  
26 limited mental health assessment.

## 27 **Results**

28 A study overview is provided in Fig. 1.

29

### 30 **Feature Selection and Elastic Net Regression**

31 GAD-7 (GAD 7-item survey), PCL-6 (PTSD Checklist 6-item survey), and PHQ-9 (depression 9-item  
32 survey) quantitative scores were derived in MHQ responders according to previous studies<sup>11</sup> (see  
33 Methods). After multiple testing correction for 772 phenotypes tested (see Methods;  $FDR < 0.05$ ), GAD-7,  
34 PCL-6, and PHQ-9 were correlated with 327, 363, and 373 phenotypes, respectively (Supplementary  
35 Table 1). We evaluated different combinations of training-test ratios and feature inclusion thresholds  
36 (defined as Spearman's rho ( $\rho$ ) relative to GAD-7, PCL-6, and PHQ-9; Supplementary Table 2).<sup>14</sup> Among  
37 MHQ responders, correlation between observed and predicted GAD-7, PCL-6, and PHQ-9 across elastic  
38 net training and test ratios were consistent at all parameter tuning combinations. We predicted each  
39 outcome in MHQ non-responders using the elastic net regression parameters with the lowest root mean  
40 square error and highest magnitude of Spearman's  $\rho$  between predicted and true outcomes. Using  
41  $\rho > 0.20$  as a feature inclusion threshold, we predicted GAD-7 with 19 phenotypes (observed *versus*  
42 predicted among test data  $\rho = 0.33$ ,  $P < 2 \times 10^{-16}$ ), PCL-6 with 15 phenotypes (observed *versus* predicted  
43 among test data  $\rho = 0.21$ ,  $P < 2 \times 10^{-16}$ ), and PHQ-9 with 17 (observed *versus* predicted among test data  
44  $\rho = 0.33$ ,  $P < 2 \times 10^{-16}$ ) phenotypes.

45 The correlated trait "*neuroticism score*" (Field ID 20127) was the feature that was most strongly  
46 associated with, and a major predictor of, internalizing symptoms in elastic net regression ("*neuroticism*

47 *score*” versus GAD-7  $\rho=0.482$ ,  $P<4.13\times 10^{-307}$ , elastic net  $\beta=0.286$ ; “*neuroticism score*” versus PCL-6  
48  $\rho=0.378$ ,  $P<4.13\times 10^{-307}$ , elastic net  $\beta=0.103$ ; “*neuroticism score*” versus PHQ-9  $\rho=0.41$ ,  $P<4.13\times 10^{-307}$ ,  
49 elastic net  $\beta=0.03$ ). The remaining predictors of internalizing symptoms capture relevant relationships  
50 with these traits, including features such as “*tenseness*” (Field ID 1990), “*frequency of tiredness in the*  
51 *last two weeks*” (Field ID 2080), and “*overall health rating*” (Field ID 2178). Supplementary Table 3  
52 shows all predictors and their elastic net regression weights in the UKB.

53

#### 54 **Characteristics of MHQ responders and non-responders**

55 Co-phenome risk scores (PheRS) are a weighted sum of the co-phenome questionnaire  
56 responses based on weights derived from elastic net regression described above. PheRS were more  
57 strongly correlated with predicted internalizing outcomes (MHQ non-responder data) than the same  
58 outcome directly ascertained in MHQ responders likely due to the independence of MHQ responder  
59 data relative to the lack of independence of these variables in MHQ non-responders (Supplementary  
60 Table 4). All predicted quantitative outcomes were greater in magnitude among the MHQ non-  
61 responders suggesting more severe symptoms compared to MHQ responders. While the difference was  
62 minor for PCL-6 (MHQ responder mean=6.69, s.d.=3.65; non-responder mean=6.82, s.d.=1.80; Cohen’s  
63  $d=-0.048$ ,  $P=9.96\times 10^{-27}$ ) and PHQ-9 (MHQ responder mean=11.73, s.d.=3.67; non-responder  
64 mean=12.02, s.d.=2.32; Cohen’s  $d=0.096$ ,  $P=2.21\times 10^{-144}$ ), it was more pronounced for GAD-7 scores  
65 (MHQ responder mean=8.97, s.d.=3.09; non-responder mean=12.36, s.d.=4.78; Cohen’s  $d=-0.749$ ,  
66  $P=1\times 10^{-322}$ ).

67 In single-variable generalized linear models, “*neuroticism score*” (a summary score of  
68 neuroticism based on 12 neurotic behaviors;  $\beta=-0.080$ , s.e.=0.001,  $P<2\times 10^{-16}$ ), “*average household*  
69 *income before tax*” ( $\beta=0.239$ , s.e.=0.003,  $P<2\times 10^{-16}$ ), PCL-6 score ( $\beta=-0.052$ , s.e.=0.002,  $P<2\times 10^{-16}$ ), GAD-

70 7 score ( $\beta=-0.202$ , s.e.=0.001,  $P<2\times 10^{-16}$ ), PHQ-9 score ( $\beta=-0.031$ , s.e.=0.002,  $P<2\times 10^{-16}$ ), and others were  
71 all associated with whether UKB participants responded to the MHQ (Supplementary Table 5). In a  
72 multivariable analysis of MHQ participation that also accounted for birthplace (north and east  
73 coordinates), age, and sex (full model  $R^2=0.300$ ,  $P<2.2\times 10^{-16}$ ), all variables remained significant  
74 (Supplementary Table 5). However, the effect of “*neuroticism score*” showed a significant opposite  
75 effect direction when accounting for the effects of the other variables included in the multivariable  
76 model (single-variable  $\beta=-0.080$ , s.e.=0.001,  $P<2\times 10^{-16}$ ; multivariable  $\beta=0.376$ , s.e.=0.003,  $P<2\times 10^{-16}$ ).  
77 This effect was due to the interplay of “*neuroticism score*” with GAD-7 symptoms (multivariable  
78 interaction term *neuroticism score* $\times$ GAD-7  $\beta=-0.086$ , s.e.=0.001,  $P<2\times 10^{-16}$ ), but it was independent of  
79 PCL-6 and PHQ-9 symptoms. Upon excluding GAD-7 from the multivariable model, “*neuroticism score*”  
80 was a negative predictor of MHQ participation ( $\beta=-0.094$ , s.e.=0.002,  $P<2\times 10^{-16}$ ). Conversely, removing  
81 PCL-6 or PHQ-9 while keeping GAD-7 in the multivariable model, did not produce the same change  
82 ( $\beta=0.381$ , s.e.=0.003,  $P<2\times 10^{-16}$  and  $\beta=0.335$ , s.e.=0.003,  $P<2\times 10^{-16}$ ). Based on these observations, UKB  
83 participants with the highest “*neuroticism scores*” (i.e., 12; mean MHQ participation probability=97.7%,  
84 s.d.=0.151) were 6.04 times more likely to contribute to the MHQ than those with the lowest  
85 “*neuroticism score*” (i.e., 0; MHQ participation probability=16.2%, s.d.=0.872,  $P_{\text{diff}}=1.03\times 10^{-203}$ ; Fig. 2).  
86 This effect appeared strongest among participants with medium (GAD-7=14) and low (GAD-7=7) GAD  
87 scores but was attenuated in the high GAD group (GAD-7=21). All samplings of GAD-7 and neuroticism  
88 score combinations are provided in Supplementary Table 5. Given the major contribution of  
89 “*neuroticism score*” in the elastic net prediction of GAD-7 ( $\rho_{\text{MHQ-responders}}=0.482$ ,  $P<4.13\times 10^{-307}$ ;  $\rho_{\text{MHQ-non-}}$   
90  $\rho_{\text{responders}}=0.984$ ,  $P<4.13\times 10^{-307}$ ), this result may highlight residual participation bias transcending GAD,  
91 PTSD, and depression psychopathologies. We detected only modest evidence of multicollinearity in the  
92 model: *neuroticism score* variance inflation factor (VIF)=2.57, GAD-7 VIF=2.46, PCL-6 VIF=1.94, and PHQ  
93 VIF=2.27. A VIF > 10 is generally considered an indicator of high correlation and high multicollinearity.<sup>15</sup>

94 Because the correlation between GAD-7 and *neuroticism score* is modest ( $\rho=0.644$ ), and the VIF for  
95 GAD-7 (2.46) and *neuroticism score* are relatively low, we can exclude multicollinearity is affecting our  
96 model of MHQ participation (Supplementary Table 5 and **Supplementary Results**).

97

## 98 **SNP-based Heritability**

99 We describe below a series of tests to verify that elastic net-predicted GAD, PTSD, and  
100 depression outcomes and PheRS capture the same genetic liability as true observations of each  
101 outcome.

102 We performed three GWAS for each trait: quantitative score, PheRS, and binary case-control  
103 status derived from the quantitative scores. All GWAS included age, sex, age $\times$ sex, and ten within-  
104 ancestry principal components as covariates. While elastic-net prediction accuracies were relatively low,  
105 genetic analyses of predicted values captured similar information to that of direct-report internalizing  
106 phenotype scores. The SNP-based heritability ( $h^2$ ) for each GWAS was significantly different from zero  
107 (Supplementary Table 6). Due to the strong contribution of "*neuroticism score*" to elastic net  
108 predictions, the detected difference between MHQ responder and non-responder *neuroticism scores*,  
109 and the well-documented heritable and polygenic architecture of *neuroticism*,<sup>16</sup> we analyze GWAS only  
110 after subjecting their effect sizes to multi-trait conditioning with a GWAS of *neuroticism*.<sup>16, 17, 18</sup> This  
111 approach facilitated an understanding of how much polygenicity and GWAS biological annotation  
112 findings could be attributed to the relatively large heritable component of neuroticism versus that of the  
113 PheRS and quantitative traits. After conditioning, all GWAS still had  $h^2$  estimates that differed  
114 significantly from zero (GAD phenotype range: MHQ-responder GAD-7-PheRS [ $h^2=0.81\%$ , s.e.=0.40,  
115  $P=0.043$ ] to MHQ non-responder GAD-7-PheRS [ $h^2=3.52\%$ , s.e.=0.32,  $P=3.82\times 10^{-28}$ ]; PTSD phenotype  
116 range: MHQ responder PTSD [ $h^2=1.88\%$ , s.e.=0.21,  $P=3.55\times 10^{-19}$ ] to MHQ responder PCL-6 [ $h^2=5.57\%$ ,  
117 s.e.=0.46,  $P=9.35\times 10^{-35}$ ]; depression phenotype range: MHQ non-responder current depression



118 [ $h^2=1.61\%$ , s.e.=0.10,  $P=2.55\times 10^{-58}$ ] to MHQ non-responder PHQ-9 [ $h^2=5.89\%$ , s.e.=0.39,  $P=1.62\times 10^{-51}$ ]).  
119 Supplementary Table 6 shows  $h^2$  estimates for all traits before and after multi-trait conditioning with the  
120 GWAS of *neuroticism*. Unless otherwise noted, we focus all analyses on the internalizing traits that were  
121 subjected to multi-trait conditioning with *neuroticism*. However, the Supplementary Material  
122 corresponding to each analysis presents results prior to multi-trait conditioning so that comparisons and  
123 contrasts may be drawn. There were several  $h^2$  estimates that differed significantly between the MHQ  
124 responder and non-responder GWAS, but there was no evidence of a systematic over- or under-  
125 estimation of SNP- $h^2$  in either cohort (Fig. 3 and Supplementary Table 6).

126

### 127 **Genetic Overlap between MHQ-responder and MHQ non-responder Traits**

128 Genetic correlations ( $r_g$ ) between GWAS performed in MHQ responders and non-responders  
129 were statistically significant and relatively high when comparing the same trait: MHQ responder *versus*  
130 non-responder GAD-7-PheRS  $r_g=1.55$ , s.e.=0.406,  $P=1.0\times 10^{-4}$ ; PCL-6-PheRS  $r_g=1.19$ , s.e.=0.097,  
131  $P=2.05\times 10^{-34}$ ; PHQ-9-PheRS  $r_g=1.15$ , s.e.=0.084,  $P=3.52\times 10^{-42}$ . The  $r_g$  estimates among all other trait  
132 combinations are provided in Supplementary Table S7. Each UKB phenotype (assessed in MHQ  
133 responders and non-responders) was genetically correlated with the corresponding Million Veteran  
134 Program (MVP) phenotype Supplementary Table 7 and after multiple testing correction for the number  
135 of  $r_{gs}$  tested there were no differences in  $r_g$  with MVP phenotype between MHQ responders and non-  
136 responders. All internalizing outcomes were negatively genetically correlated with subjective well-being  
137 ( $FDR<0.05$ , Supplementary Table 7).

138 We next evaluated how genetic effects detected in the MVP cohort predicted internalizing  
139 outcomes in MHQ responders and non-responders (Fig. 3 and Supplementary Fig. 2). The MHQ non-  
140 responders generally had greater PRS z-scores and  $R^2$  relative to the responders (Supplementary Table  
141 8). The PCL-6 phenotype variance explained was notably greater in the MHQ non-responders (e.g., MHQ

142 responders minimum  $P$ -value= $2.93 \times 10^{-21}$ , variance explained ( $R^2$ )=0.063% and MHQ non-responders  $P$ -  
143 value= $2.86 \times 10^{-40}$ ,  $R^2$ =0.092%,  $P_T=1 \times 10^{-5}$  at  $P_T=1 \times 10^{-5}$ ) likely reflecting greater statistical power due to the  
144 PTSD informativeness of the MHQ non-responder sample. Regression coefficients for GAD and PTSD  
145 PheRS and predicted case-control status presented similar power improvements in the no-MHQ cohort  
146 (Supplementary Table 8). Due to complete sample overlap between UKB depression data and the MVP  
147 broad depression GWAS,<sup>3</sup> PRS were not performed for predicted PHQ-9.

148

### 149 **Gene Discovery through Meta-Analysis**

150 High genetic correlation and strong polygenic prediction between MHQ responder and non-  
151 responder GWAS support the reliability of the genetic information derived from MHQ non-responders.  
152 Accordingly, we combined the predicted data (MHQ non-responder) with the direct-report information  
153 (MHQ responder) available for GAD and PTSD. First, we meta-analyzed the UKB MHQ responders and  
154 non-responders to describe how using the entire UKB enhances gene discovery. Second, we meta-  
155 analyzed the two UKB cohorts with other available datasets. Here, we present data from the meta-  
156 analysis of UKB MHQ responders, non-responders, and MVP subjected to multi-trait conditioning with  
157 *neuroticism*. Results from meta-analyses not subjected to multi-trait conditioning with *neuroticism* are  
158 provided in **Supplementary Material** and should be interpreted with the expectation that much of the  
159 detected signal may be attributable to genetic liability to *neuroticism*. Results of meta-analyzed  
160 depression (UKB only) offered no increase in sample size or  $h^2$  relative to MVP broad depression,<sup>3</sup> and  
161 therefore was omitted from *in silico* analyses.

162 Quantitative traits and PheRS revealed slightly different risk loci for each outcome  
163 (Supplemental Table 9 and Supplementary Fig. 1) but these differences may reflect random sampling  
164 noise as there was no statistical difference in the genome-wide significant variants effects  
165 (Supplementary Table 10). Applying a genome-wide multiple testing correction ( $P < 5 \times 10^{-8}$ ), we

166 discovered (i) 10 and 12 risk loci for GAD when meta-analyzing with GAD-7 and GAD-7 PheRS,  
167 respectively and (ii) 32 and 26 risk loci for PTSD when meta-analyzing with PCL-6 and PCL-6 PheRS,  
168 respectively. We defined a credible set of likely causal loci: 70% of GAD-7 loci, 50% of GAD-7 PheRS loci,  
169 46.8% of PCL-6 loci, and 23.1% of PCL-6 PheRS loci (Supplementary Table 11). Some loci that positionally  
170 mapped (2-kb windows; 1-kb window on both sides to capture cis-regulatory effects)<sup>19</sup> to genic regions  
171 have prior evidence of involvement in GAD (*e.g.*, *PHF2*-rs12376738 and resistance to depression- and  
172 anxiety-like symptoms<sup>20</sup> and memory consolidation<sup>21</sup>), PTSD (*e.g.*, *IL2*-rs45510091 and low dose cytokine  
173 treatments to reverse anxious symptoms), or related symptoms.<sup>22</sup>

174 After study-wide multiple testing correction ( $P_{adj} < 1.25 \times 10^{-8} = 5 \times 10^{-8} / 2 \text{ traits} / 2 \text{ definitions of each}$   
175 trait), 7 and 6 loci were associated with GAD based on meta-analyses with GAD-7 and GAD-7 PheRS,  
176 respectively and 22 and 19 loci were associated with PTSD based on meta-analyses with PCL-6 and PCL-6  
177 PheRS, respectively (Fig. 4 and Supplementary Tables 9 and 10). Six genes were positionally mapped to  
178 genomic risk loci detected in GAD and PTSD GWAS: *ADAD1-IL2-IL21-KIAA1109* gene cluster, *CRHR1-*  
179 *MAPT-NSF-PLEKHM1-WNT3* gene cluster, *FAM120-FAM120AOS-PHF2* gene cluster, *MAD1L1*, *SOX6*, and  
180 *TMEM106B*.

181 Out-sample PRS and functional annotation in the following sections were performed using the  
182 most powerful conditioned meta-analysis for each outcome (*i.e.*, highest  $h^2$  z-score): meta-analysis of  
183 GAD using GAD-7 PheRS ( $h^2=2.96\%$ ,  $s.e.=0.16$ ,  $P=2.06 \times 10^{-76}$ ) and meta-analysis of PTSD using PCL-6  
184 PheRS ( $h^2=4.08\%$ ,  $s.e.=0.18$ ,  $P=8.86 \times 10^{-114}$ ; Fig 3. and Supplementary Table 12).

185

## 186 **Out-Sample PRS**

187 Out-sample PRS were calculated two ways. First, we evaluated overlap between the meta-  
188 analyses from this study with previous GWAS of anxiety and PTSD traits from FinnGen  
189 (KRA\_PSY\_ANXIETY N=15,770 cases and 161,129 controls; F5\_PTSD N=781 cases and 161,390 controls),

190 the PGC (PTSD v1 N=2,424 cases and 7,113 controls)<sup>23</sup>, and ANGST (N=17,310).<sup>24</sup> At all  $P$ -value  
191 thresholds ( $P_T$ ), GAD and PTSD GWAS from this study predicted all out-sample GWAS ( $P<0.05$ ;  
192 Supplementary Table 13). The maximum association for each trait was: GAD *versus* FinnGen  
193 KRA\_PSY\_ANXIETY ( $R^2=0.029\%$ ,  $P_T=0.1$ ,  $P=2.34\times 10^{-13}$ ) and PTSD *versus* PGC PTSD v1 ( $R^2=0.006\%$ ,  $P_T=0.3$ ,  
194  $P=6.03\times 10^{-4}$ ).

195 Second, GAD and PTSD meta-analyses were used to predict GAD and PTSD symptoms in  
196 individual-level data from the Philadelphia Neurodevelopmental Cohort<sup>25, 26</sup> and Yale-Penn<sup>27, 28</sup> (Fig. 5).  
197 All PRS models were significant with at least one  $P_T$  ( $P<0.05$ ) but GAD ( $R^2=0.103\%$ ,  $P_T=5\times 10^{-8}$ ,  $P=0.015$ )  
198 and PTSD meta-analyses ( $R^2=0.874\%$ ,  $P_T=1\times 10^{-7}$ ,  $P=1.57\times 10^{-4}$ ) best predicted corresponding symptoms in  
199 the PNC.

200

## 201 Prenatal Transcriptomic Enrichment

202 GWAS of GAD and PTSD were enriched for loci associated with multiple brain tissues  
203 (Supplementary Table 14). Brodmann Area 9 (BA9, a component of the dorsolateral prefrontal cortex)  
204 was enriched in both traits (GAD  $\beta=0.022$ , s.e.=0.007,  $P=9.07\times 10^{-4}$ ; PTSD  $\beta=0.030$ , s.e.=0.007,  $P=2.85\times 10^{-5}$ ). Each GAD and PTSD GWAS also was associated with transcriptomic profiles from the prenatal  
205 developmental stage (Fig. 6): GAD and late-mid prenatal tissue ( $\beta=0.041$ , s.e.=0.014,  $P=0.003$ ); PTSD and  
206 late-mid prenatal tissue ( $\beta=0.042$ , s.e.=0.015,  $P=0.003$ ; Supplementary Table 15). We attribute these  
207 enrichments to greater sample size and improved power relative to prior studies rather than multi-trait  
208 conditioning with *neuroticism score* as evidenced by detection of concordant enrichments in the  
209 unconditioned results (Supplementary Tables 14 and 15).

210  
211 To investigate further the enrichment of prenatal tissue effects, we performed 3-D chromatin-  
212 aware gene-based association of GAD and PTSD GWAS using fetal brain tissue. We uncovered 135 GAD  
213 and 927 PTSD associated genes ( $FDR<0.05$ ) in the context of fetal chromatin interactions including

214 *CRHR1* (GAD  $P=1.54 \times 10^{-5}$ ; PTSD  $P=1.75 \times 10^{-8}$ ), *THSD7A* (GAD  $P=1.27 \times 10^{-8}$ ; PTSD  $P=1.29 \times 10^{-7}$ ), and *LAMB2*  
215 (GAD  $P=5.16 \times 10^{-5}$ ; PTSD  $P=4.44 \times 10^{-7}$ ). After study-wide multiple testing correction ( $FDR < 0.05$ ), 86 and  
216 584 genes were associated with GAD and PTSD, respectively (Supplementary Table 16).

217 Consistent with tissue and 3-D chromatin analyses, cell-type enrichments reinforce the  
218 contribution of prenatal development in the liability for GAD and PTSD outcomes (Supplementary Table  
219 17 and 18). GAD and PTSD GWAS were enriched for independent signals from post-conception  
220 prefrontal cortex neurons.<sup>29</sup> In PTSD, two brain cell types had cross-dataset significant effects:  
221 GABAergic neurons from gestational week 26 (GW26) prefrontal cortex tissue ( $\beta=0.041$ , s.e.=0.012,  
222  $P=2.64 \times 10^{-4}$ ) and from the midbrains of 6-to-11-week-old embryos ( $\beta=0.246$ , s.e.=0.050,  $P=5.58 \times 10^{-7}$ ). In  
223 GAD, the same two cell types were observed but did not survive multi-trait conditioning with  
224 *neuroticism*. Cross-data set analyses support partial independence of these signals with primary effects  
225 from 6-to-11-week-old midbrain neurons (proportional significance of midbrain GABAergic neurons  
226 given prefrontal cortex GABAergic neurons:  $PS_{\text{Mid\_NbGaba, GW26\_Gaba}}=0.700$ ;  $PS_{\text{GW26\_NbGaba, Mid\_Gaba}}=0.269$ ).<sup>19</sup>

227

## 228 **Drug Targets and Repositioning**

229 We investigated two means of drug targeting for the GAD and PTSD outcomes studied. First, we  
230 tested for  $r_g$  and evidence of latent causal effects (LCV) between GAD, PTSD, and medication use  
231 GWAS.<sup>30, 31</sup> GAD and PTSD GWAS were most strongly genetically correlated with opioid use (GAD  
232  $r_g=0.530$ , s.e.=0.035,  $P=1.08 \times 10^{-50}$ ; PTSD  $r_g=0.603$ , s.e.=0.028,  $P=1.27 \times 10^{-100}$ ) and antidepressant use  
233 (GAD  $r_g=0.597$ , s.e.=0.041,  $P=1.94 \times 10^{-48}$ ; PTSD  $r_g=0.632$ , s.e.=0.035,  $P=3.23 \times 10^{-74}$ ). There were no  
234 significant differences in medication use  $r_g$  due to multi-trait conditioning with *neuroticism*  
235 (Supplementary Table 19). We detected a single putative causal relationship ( $FDR < 0.05$ ) between use of  
236 vasodilators and GAD (genetic causality proportion=0.093, s.e.=0.285,  $P=1.04 \times 10^{-4}$ ; Supplementary Table  
237 20). Two-sample Mendelian randomization based on non-overlapping datasets (MVP GAD two-item

238 questionnaire and UKB “use of vasodilators”) was insufficiently powered to confirm this causal  
239 hypothesis (Supplementary Results and Supplementary Table 21).

240         Second, we applied gene-ontology based drug repurposing. Gene-ontology enrichments were  
241 performed by mapping each LD-independent locus to a single gene to avoid redundant signals from  
242 nearby genes. Relative to the lead SNP in each LD-independent genomic risk locus we retained the  
243 nearest gene with the highest probability of loss of function intolerance (9 GAD and 17 PTSD genes;  
244 Supplementary Table 22) and detected 87 GAD and 28 PTSD gene-sets (FDR<0.05,  $P_{adj}=4.55 \times 10^{-6}$  based  
245 on 72,394 human gene sets,<sup>32</sup> Supplementary Table 23). Forty-five drugs were nominally associated with  
246 both GWAS (Supplementary Table 24) highlighting compounds with evidence as treatment for anxiety  
247 disorders (*e.g.*, dexpropranolol<sup>33, 34</sup> GAD  $P=0.006$ , EScore=0.308; PTSD  $P=0.032$ , EScore=0.434). After  
248 multiple testing correction (FDR<0.05 applied per trait) we uncovered (i) upregulation of GAD gene-sets  
249 in the context of aminohippuric acid, a putative biomarker of depression and anxiety disorders  
250 ( $P=1.08 \times 10^{-5}$ , EScore=0.917).<sup>35</sup>

## 251 Discussion

252         Extremely large cohorts are required to discover polygenic signals associated with anxiety<sup>12, 24, 36,</sup>  
253 <sup>37</sup> and PTSD.<sup>4, 5, 23, 38</sup> Biobanks, such as UKB, offer a unique opportunity to boost sample size, power, and  
254 trait ascertainment homogeneity. In practice, studying mental health in the UKB is limited by the  
255 number of MHQ responders (only 31% of participants<sup>8, 11, 12</sup>) and the non-random missingness in the  
256 questionnaire participation. Due to the large proportion of missingness in the UKB MHQ, we aimed to  
257 maximize the sample size informative for GAD and PTSD by predicting quantitative and case-control  
258 phenotypes using elastic net regression in the UKB MHQ non-responders, then using the predicted traits  
259 in GWAS. We extend this prediction by using elastic net regression weights to calculate co-phenome  
260 PheRS.

261 We found that predicted GAD and PTSD outcomes and co-phenome PheRS reliably capture the  
262 genetic architecture of these traits of interest. Unsurprisingly, *neuroticism score* was a major correlate of  
263 each outcome and contributed substantial predictive power to the elastic net regression. We showed  
264 that in the context of income and internalizing spectrum psychopathologies, higher neuroticism scores  
265 were paradoxically associated with higher probability of participating in the MHQ. However, this effect  
266 appears to be driven by UKB participants with low-to-medium GAD-7 scores. While models of MHQ  
267 participation included GAD-7, PCL-6, and PHQ-9, all of which rely on the neuroticism score in their elastic  
268 net prediction, we captured independent effects such that accounting for GAD-7 changes the effect  
269 direction of *neuroticism* in a way that PCL-6 and PHQ-9 do not. This indicates that the change in the  
270 effect direction is not an artifact of co-phenome prediction and is also consistent with prior evidence of  
271 a two-factor model of *neuroticism*.<sup>39</sup> The effect of neuroticism on MHQ participation may be due to  
272 liability of a subtype rather than neuroticism more broadly. Our data suggest that the interplay between  
273 *neuroticism* and GAD directly affect the MHQ participation bias. This could be due to the elevated  
274 anxiousness/tenseness elements rather than worry/vulnerability elements of *neuroticism*.<sup>39</sup> *Neuroticism*  
275 is a transdiagnostic psychosocial factor, and this observation may indicate that (i) MHQ responders are  
276 characterized by less severe internalizing symptoms, (ii) MHQ responders may over-report the severity  
277 of these symptoms, and (iii) MHQ responders represent a subset of the UKB of greater socioeconomic  
278 status than non-responders.<sup>39, 40</sup> We initially hypothesized that prior internalizing studies in the UKB  
279 were under powered due to sample size but the data reported here support a more refined hypothesis.  
280 Following previous evidence of a two-factor model of *neuroticism*, the depletion of a subtype (e.g.,  
281 worry/vulnerability factor) in MHQ responders relative to non-responders may at least partially explain  
282 why previous GWAS of anxiety and PTSD traits in the UKB had only limited success and perhaps  
283 reinforces the relationship between *neuroticism* subtype, socioeconomic status, and mental health.<sup>17, 39</sup>  
284 We leverage the higher *neuroticism scores* of MHQ non-responders to more than double the sample size

285 upper limit for GWAS of GAD and PTSD outcomes while enriching the sample for individuals with  
286 objectively more severe symptoms. This procedure resulted in detection of more than twice the  
287 genomic risk loci associated with anxiety and PTSD relative than any of the previous studies.

288 Meta-analyses using PheRS were more powerful than meta-analyses using predicted  
289 quantitative traits. Though  $h^2$  differences between PheRS and quantitative outcomes were relatively  
290 small, we hypothesize that PheRSs capture slightly more accurate information about each trait because  
291 they are derived from tangential responses to questions not ascertained in the context of mental health  
292 (i.e., as part of the MHQ). In other words, studying the genetic liability of PheRS in combination with a  
293 directly ascertained quantitative symptom count may help reduce analytic noise associated with self-  
294 reported symptoms.<sup>41</sup>

295 Several approaches to risk locus functional annotation converged on fetal/prenatal biology.  
296 These findings are interesting given the childhood to mid-adult onset of internalizing disorders.<sup>42</sup> We  
297 attribute this observation to the statistical power increases due to a larger sample size rather than multi-  
298 trait conditioning with *neuroticism*.<sup>16, 17</sup> Consistent with previous studies,<sup>43, 44</sup> the dorsolateral prefrontal  
299 cortex (DLPFC) was identified here as a tissue of interest for GAD and PTSD by GTEx tissue-wide analysis.  
300 We extended these observations to cell-type and 3-D chromatin interaction data to detect gestational  
301 week GABAergic neurons and several key genes of interest with significant effects in fetal brain tissue  
302 (GAD: *TMEM106B*; PTSD: *CRHR1*, *LAMB2*). In a prior single-cell RNA-seq study of the DLPFC (N=1,057  
303 neurons), late gestational periods detected in our study were most enriched for genes related to axon  
304 guidance, neuron differentiation, axonogenesis, and regulation of neuron projection development.<sup>29, 45</sup>

305 We utilized the improved power of our meta-analyses to identify potential drug targets and/or  
306 drugs that induce anxiety and/or PTSD symptoms as adverse effects. The strongest genetic correlate of  
307 each trait was antidepressant use. We also detected a relationship between use of vasodilators and GAD  
308 using the LCV approach that could not be confirmed using a two-sample MR approach but has been



309 detected by prior epidemiology research.<sup>46</sup> The partial causal effect size of vasodilator use on GAD was  
310 small, so MR might be under-powered to detect this result considering (i) the requirement for non-  
311 overlapping samples and (ii) biases in LCV estimates in the presence of strong pleiotropic effects among  
312 highly polygenic traits.<sup>31</sup> The discordance between these methods may reflect a causal relationship  
313 between GAD and vasodilator use that transcends a genetically-regulated molecular relationship (e.g.,  
314 regulatory or proteomic elements).

315         The results from our study recapitulate and expand prior findings on the biology of GAD and  
316 PTSD but there are several key limitations to be considered. First, while capturing very similar genetic  
317 liability to GAD and PTSD, the elastic net-predicted phenotypes used in meta-analyses were weakly  
318 correlated with corresponding known GAD-7 and PCL-6 scores among UKB responders. Thus, there is no  
319 utility of these values for epidemiological studies of GAD or PTSD. However, they are valuable in genetic  
320 studies that aim to uncover biological mechanisms underlying psychopathology. Second, our study is  
321 restricted to participants of European ancestry and may/may not generalize to individuals of other  
322 ancestries. This lack of proven generalizability may be attributed both to genetic differences and  
323 documented variability in how racial and ethnic groups access and experience healthcare systems.<sup>47</sup> In  
324 future work, our group and others will aim to recognize and reduce these health disparities using  
325 carefully tailored co-phenomes for these populations.<sup>13</sup> Third, machine learning (i.e., elastic net  
326 regression) identifies patterns in data, not necessarily trait relationships. Thus, our analysis identified  
327 mathematically informative and biologically meaningful relationships with which to predict GAD and  
328 PTSD symptoms. However, these features, their predictive patterns, and the regression weights  
329 reported here may not translate outside the UK Biobank. Future studies will need to investigate how  
330 well PheRS created in one cohort may generalize to other cohorts. Finally, solutions to non-random  
331 missingness can be influenced by the proportion of missingness in a given dataset. Our data support the  
332 non-random nature of UKB MHQ missingness with respect to certain features of mental health (e.g.,

333 higher *neuroticism scores*) but this attribute of data missingness may not generalize to other biobanks.  
334 Future work on the generalizability of these findings will require detailed investigation of the type of  
335 missingness observed, its proportion relative to non-missing data, and how best to fill those gaps  
336 including the utility of other machine learning and/or imputation pipelines.

337 The elastic net predicted phenotypes derived here permit studies of GAD and PTSD in the whole  
338 UKB cohort. Our results provide one roadmap by which the community may improve sample size, and  
339 statistical power, for enhanced risk locus discovery in the context of incompletely ascertained traits in  
340 the UKB and other biobanks with limited mental health assessment. We use these data to present  
341 biological underpinnings uncovered from analysis of the largest GWAS meta-analysis of these traits to  
342 date.

## 343 **Online Methods**

### 344 **Participants**

345 The UKB is a large population-based cohort of over 502,000 participants between the ages of 37  
346 and 73 at the time of recruitment. UKB assesses a wide range of factors in a generally healthy cohort  
347 including physical health, anthropometric measurements, circulating biomarkers, and sociodemographic  
348 characteristics. A subset of individuals ( $N=157,366$ ) completed an ancillary online mental health  
349 questionnaire (MHQ)<sup>11</sup> covering topics of self-reported mental health and well-being.

350

### 351 **GAD-7 Definition**

352 GAD-7<sup>48</sup> represents the summed score of seven questions from the UKB MHQ all of which are  
353 ranked by participants from 1="Not at all," 2="Several days," 3="More than half the days," to 4="Nearly  
354 every day" with respect to how frequently they have been bothered by a given problem over the last  
355 two weeks. GAD-7 symptom items are Field ID 20505 "recent easy annoyance of irritability," Field ID

356 20506 “recent feelings of nervousness or anxiety,” Field ID 20509 “recent inability to stop or control  
357 worrying,” Field ID 20512 “recent feelings of foreboding,” Field ID 20515 “recent trouble relaxing,” Field  
358 ID 20516 “recent restlessness,” and Field ID 20520 “recent worrying too much about different things.”<sup>11</sup>  
359 The mean GAD-7 score among UKB MHQ responders of European ancestry was  $8.97 \pm 3.09$  ( $N=124,534$ ).  
360 GAD-7 scores were stratified into current anxiety symptoms cases and controls using a cutoff threshold  
361 of  $GAD-7 \geq 10$  ( $N_{case} = 81,072$ ;  $N_{control} = 108,811$ ).<sup>12</sup>

362

### 363 **PCL-6 Definition**

364 PCL-6<sup>49</sup> represents the summed score of six questions from the UKB MHQ. Five questions are  
365 ranked by participants from 0=“Not at all,” 1=“A little bit,” 2=“Moderately,” 3=“Quite a bit,” to  
366 4=“Extremely” with respect to a list of problems and complaints experienced in response to extremely  
367 stressful experiences over the past month. One questions (Field ID 20508) was ranked by participants  
368 from 1=“Not at all,” 2=“Several days,” 3=“More than half the days,” to 4=“Nearly every day” with  
369 respect to how frequently they have been bothered by a given problem over the last two weeks. PCL-6  
370 symptom items are Field ID 20494 “felt irritable or had angry outbursts in past month,” Field ID 20495  
371 “avoided activities or situations because of previous stressful experience in past month,” Field ID 20497  
372 “repeated disturbing thoughts of stressful experience in past month,” Field ID 20498 “felt very upset  
373 when reminded of stressful experience in past month,” and Field ID 20508 “recent trouble concentrating  
374 on things.”<sup>11</sup> The mean PCL-6 score among UKB MHQ responders of European ancestry was  $6.59 \pm 3.68$   
375 ( $N=126,219$ ). PCL-6 scores were stratified into cases and controls using a cutoff threshold of  $PCL-6 > 13$   
376 ( $N_{case}=3,663$ ;  $N_{control}=181,232$ ).<sup>4</sup>

377

### 378 **PHQ-9 Definition**

379 PHQ-9<sup>48</sup> represents the summed score of nine items from the UKB MHQ the UKB MHQ all of  
380 which are ranked by participants from 1="Not at all," 2="Several days," 3="More than half the days," to  
381 4="Nearly every day" with respect to how frequently they have been bothered by a given problem over  
382 the last two weeks. PHQ-9 MHQ items are Field ID 20507 "recent feelings of inadequacy," Field ID 20508  
383 "recent trouble concentrating," Field ID 20510 "recent feelings of depression," Field ID 20511 "recent  
384 poor appetite or overeating," Field ID 20513 "recent thoughts of suicide or self-harm," Field OD 20514  
385 "recent lack of interest or pleasure in doing things," Field ID 20517 "trouble falling or staying asleep, or  
386 sleeping too much," Field ID 20518 "recent changes in speed/amount of moving or speaking," Field ID  
387 20519 "recent feelings of tiredness or low energy."<sup>11</sup> The mean PHQ-9 score among UKB Europeans who  
388 completed the MHQ was 11.73±3.67.

389

### 390 **Million Veteran Program Phenotypes**

391 GAD-2 represents the summed score of self-report responses to two-questions regarding how  
392 bothered they felt by the following problems: (i) feeling nervous, anxious, or on edge and (ii) not being  
393 able to stop or control this worrying. Each question was ranked from 0="Not at all" to 3="Nearly every  
394 day" and was contextualized with feelings experienced over the two weeks prior to responding. The  
395 GAD-2 GWAS consisted of 175,163 participants of European ancestry producing an estimated GAD-2  
396  $h^2=5.75\% \pm 0.42$ .<sup>36</sup>

397 PCL-Total (or PCL-17) is the summed score of 17 questions about the extent to which a  
398 participant has been affected by a given experience. Each question was ranked from 1="Not at all" to  
399 5="Extremely" with respect to experiences over the past month. The PCL-Total GWAS consisted of  
400 186,689 participants of European ancestry producing an estimated GAD-2  $h^2=8.84\% \pm 0.48$ .<sup>5</sup>

401 The GWAS of broad depression<sup>3</sup> included 1,154,267 individuals from the MVP, 23andMe Inc.,  
402 UKB, and FinnGen.<sup>1, 50</sup> The MVP cohort included cases with at least one inpatient code or two outpatient

403 codes for major depressive disorder and controls with no record or in- or outpatient codes for  
404 depression. Subjects with only one outpatient depression code were excluded. Eighteen ICD codes were  
405 considered for case inclusion. The  $h^2$  of broad depression in this large meta-analysis was  $11.3\% \pm 0.38$ .

406

#### 407 **First-Pass Feature Selection**

408 The UKB contains thousands of potentially informative phenotypes for predicting a given  
409 outcome. We narrowed our focus to a subset of these with which to perform elastic net regression (see  
410 Elastic Net Regression Parameter Optimization). We selected phenotypes with more than 200,000  
411 responses, not part of the MHQ, and lacking highly dimensional structure (e.g., ICD-9/10 codes,  
412 medication endorsements (Field ID 20003)), and those attributes available through special requests  
413 (e.g., greenspace (Field ID 24500) and water percentages (Field ID 24502)). The final feature set included  
414 772 phenotypes.

415

#### 416 **Elastic Net Regression Parameter Optimization**

417 To focus the selection of co-phenome features, we tested for phenome-wide Spearman correlations  
418 between GAD-7 and PCL-6 and all 772 features in the UKB MHQ responders of European ancestry (total  
419  $N=132,016$ ). Removing related individuals was done per trait such that the member of each related pair  
420 with the larger symptom count could be retained. Using the magnitude of rho for all nominally  
421 significant features of the phenome, we performed elastic net regression three ways to determine  
422 optimal model parameters with which to predict GAD-7 and PCL-6 in the UKB sample lacking MHQ data.  
423 Three training and test proportions ( $25\%_{\text{train}} | 75\%_{\text{test}}$ ,  $50\%_{\text{train}} | 50\%_{\text{test}}$ , and  $75\%_{\text{train}} | 25\%_{\text{test}}$ ) were tested  
424 for four thresholds of rho used to include features in the regression:  $\rho > 0.3$ ,  $> 0.25$ ,  $> 0.2$ ,  $> 0.15$ . Elastic net  
425 regression was performed with the `glmnet` R package<sup>51</sup> for each parameter setting using standardized  
426 50-fold cross validation using the best-fit penalizing parameter lambda. Parameter combination success

427 was determined by comparing predicted GAD-7 and PCL-6 to MHQ-derived GAD-7 and PCL-6 using  
428 Spearman correlation. Test results are described in Supplementary Table 2. Using the optimal feature  
429 inclusion settings, feature weights (elastic net  $\beta$ ) were extracted with which to calculate co-phenome  
430 risk scores (see **Creation and Reliability of Co-Phenome Risk Score**).

431

### 432 **Creation and Reliability of Co-Phenome Risk Scores**

433 Phenotype risk scores were calculated as described previously.<sup>13</sup> Briefly, we calculated GAD and  
434 PTSD risk scores as the weighted sum of the co-phenome. Each phenotype was weighted by the effect  
435 size obtained from 50-fold cross validation elastic net regression. GAD and PTSD co-phenome

436  $PheRS = \sum_{i=1}^{N_p} w_p X_{i,p}$ , where  $N_p$  is the number of comorbid phenotypes determined by Spearman  $\rho$ ,  $X_{i,p}$

437 is set to 0 if the trait response was coded as missing, “prefer not to answer,” or a comparable derivative  
438 indicating a non-answer to the UKB question and  $w_p$  is the effect size ( $\beta$ ) obtained from elastic net  
439 regression.

440 We determined the reliability of predicted GAD and PTSD outcomes and co-phenome PheRS  
441 several ways. First, within the MHQ responders and MHQ non-responders, we correlated quantitative  
442 outcomes, co-phenome PheRS, and categorical diagnoses. Second, based on GWAS of each GAD and  
443 PTSD outcomes, we performed genetic correlation within and between MHQ responders and MHQ non-  
444 responders. As a positive control with positive  $r_g$ , we included the GWAS of neuroticism from the Social  
445 Science Genetic Association Consortium (SSGAC);<sup>16</sup> as a positive control with negative  $r_g$ , we included  
446 the GWAS of subjective well-being from SSGAC.<sup>16</sup> Third, we calculated polygenic risk scores for each  
447 unrelated European-ancestry participant in the UKB using GAD-2 (GWAS  $N=199,611$ )<sup>36</sup> and PTSD PCL-17  
448 (GWAS  $N=186,689$ )<sup>5</sup> from the Million Veteran Program (MVP). To our knowledge, these GWAS represent  
449 the largest and most powerful genetic assessments of GAD and PTSD outcomes with no known overlap  
450 with UKB. PRS were calculated with PRSice v2<sup>52</sup> with the following clumping parameters to select linkage

451 disequilibrium independent variants:  $r^2=0.001$ ,  $P=1$ , in 10,000-kb windows. The range of GAD SNPs  
452 included in the PRS at minimum and maximum  $P$ -values thresholds ( $P_T$ ) was 5 ( $P_T=5 \times 10^{-8}$ ) to 4,060 ( $P_T=1$ );  
453 the range of PTSD SNPs included in the PRS at minimum and maximum  $P$ -value thresholds: 14 ( $P_T=5 \times 10^{-8}$ )  
454 to 10,264 ( $P_T=1$ ). Relationships between PRS, co-phenome PheRS, quantitative outcomes, and case-  
455 control diagnoses were tested using age, sex, age $\times$ sex, and the first ten within-ancestry principal  
456 components as covariates.

457

### 458 **Modeling MHQ Participation**

459 We build a logistic regression model of MHQ participation using UKB participants who  
460 completed the online MHQ (Supplementary Table 5a). To evaluate the effects of each predictor, we  
461 estimated predicted probabilities of MHQ participation using the R package `effects`.<sup>53</sup> In R, the top  
462 two predictors of MHQ participation were sampled 100 times at each stratum of neuroticism score  
463 (range 0-12). Multicollinearity among model predictors was tested using `mctest`.<sup>54</sup> Briefly, `mctest`  
464 computes overall (i.e., model-level) and individual (i.e., variable-level) multicollinearity diagnostics. The  
465 package therefore permits the identification of which predictors are the source of collinearity.

466

### 467 **GWAS of GAD and PTSD Co-Phenome Risk Scores and Predicted Outcomes**

468 Genotyping and imputation of the UKB cohort has been previously described.<sup>8</sup> Briefly, UKB  
469 participants were genotyped using custom Axiom array with marker content chosen to capture genome-  
470 wide genetic variation and short insertion/deletions, including coding variants across a range of minor  
471 allele frequencies and markers providing good coverage for imputation in European ancestry  
472 populations. UKB was imputed using the Haplotype Reference Consortium reference panel.

473 Genome-wide association studies (GWAS) of GAD and PTSD were performed in two ways: (i) in  
474 the subset of UKB MHQ responders and (ii) in the UKB MHQ non-responders using predicted GAD and

475 PTSD outcomes. For this study, all GWAS were restricted to UKB participants of European ancestry as  
476 identified by a two-stage ancestry assignment and pruning procedure from the Pan-UKB. Briefly, PCA  
477 was performed on unrelated individuals from a combined reference panel from the 1000 Genomes  
478 Project and Human Genome Diversity Project. A random forest classifier was trained to assign  
479 continental ancestry assignments based on six principal components. Unknowns from the UKB were  
480 assigned to an ancestry group if their random forest probability was >50%. This list was further refined  
481 to remove ancestry outliers based on within-population PC distances from 3-5 centroids. Detailed  
482 description of these methods is provided at [https://pan.ukbb.broadinstitute.org/docs/technical-](https://pan.ukbb.broadinstitute.org/docs/technical-overview)  
483 overview.

484 Linear regression was performed in PLINK 2.0 using SNPs with imputation INFO scores > 0.8,  
485 minor allele frequencies > 0.01, missingness < 0.05, and Hardy-Weinberg equilibrium  $P$ -values >  $1 \times 10^{-10}$ .  
486 We included age, sex, age $\times$ sex, and the first ten within-ancestry principal components as covariates in  
487 each GWAS. GWAS of each trait were meta-analyzed with the MVP counterpart GWAS using METAL.<sup>55</sup>  
488 Per meta-analyzed GWAS, we applied a genome-wide significance threshold of  $5 \times 10^{-8}$ . To account for  
489 multiple testing correction, we also considered a study-wide significance threshold of  $1.25 \times 10^{-8} =$   
490  $0.05/1,000,000$  LD independent SNPs in EUR/2 meta-analyses/2 internalizing traits.

491

#### 492 **Locus Fine-mapping**

493 We fine-mapped the association statistics of four phenotypes (GAD and PTSD phenotype risk  
494 scores and two quantitative outcomes) for a 1MB region around the LD-independent significant SNPs as  
495 identified by FUMA (FUncional Mapping and Annotation (FUMA v1.6a;  $r^2=0.6$  in 2-kb windows; 1-kb  
496 window on each side<sup>19</sup>). Each region for the respective association was fine-mapped to determine the  
497 95% credible set using `susieR`<sup>56</sup> with at most 10 causal variants. The credible set reports whether each  
498 identified variant is among a set of most likely causal variants and the marginal posterior inclusion



499 probability (PIP) for causal set membership. PIPs range from 0 to 1 with values closer to 1 indicating  
500 greater causal probability.

501

## 502 **LDSC and SNP-based Heritability**

503 Observed-scale heritability was calculated for each GWAS using Linkage Disequilibrium Score  
504 Regression (LDSC)<sup>30</sup> with the 1000 Genomes Project European ancestry reference LD panel. LDSC also  
505 was used to calculate (i) genetic correlation between GWAS in MHQ responders and MHQ non-  
506 responders, (ii) genetic correlation between GAD and PTSD outcome GWAS from the UKB and MVP, and  
507 (iii) genetic correlation between medication use traits from UKB and meta-analyzed GAD and PTSD  
508 outcomes (i.e., UKB + MVP). Liability-scale  $h^2$  estimates were generated using the sample case  
509 prevalence (Supplementary Table 6) and population-prevalence as following: GAD = 16%,<sup>57</sup> PTSD = 7%,<sup>58</sup>  
510 MDD = 20%.<sup>59</sup>

511

## 512 **Functional Annotation**

513 GAD and PTSD outcome liability loci were positionally mapped with Multi-marker Analysis of  
514 GenoMic Annotation (MAGMA v1.08) implemented in FUMA v1.6a<sup>60</sup> using 2-kb positional mapping  
515 around each lead SNP.<sup>19</sup> Linkage disequilibrium independent genomic risk loci are defined by their lead  
516 SNP ( $P < 5 \times 10^{-8}$ ) and all surrounding SNPs with  $r^2 > 0.6$  with the lead SNP.

517 Enrichment of tissue transcriptomic profiles was tested relative to Genotype-Tissue Expression  
518 (GTEx v8<sup>61</sup>) 53 tissue types and the BrainSpan Atlas of the Developing Human Brain<sup>62</sup> 29 brain ages  
519 ranging from 8 weeks post-conception to 40 years old and 11 general developmental stages of the brain  
520 ranging from early prenatal to middle adulthood.

521 Cell-type transcriptomic profile enrichments were performed using 13 human-specific  
522 transcriptomic profile datasets related to the brain: PsychENCODE\_Developmental,

523 PsychENCODE\_Adult, Allen\_Human\_LGN\_level1, Allen\_Human\_LGN\_level2, Allen\_Human\_MTG\_level1,  
524 Allen\_Human\_MTG\_level2, DroNc\_Human\_Hippocampus,  
525 GSE104276\_Human\_Prefrontal\_cortex\_all\_ages, GSE104276\_Human\_prefrontal\_cortex\_per\_ages,  
526 GSE67835\_Human\_Cortex, GSE67835\_Human\_Cortex\_woFetal,  
527 Linnarson\_GSE101601\_Human\_Temporal\_cortex and Linnarson\_GSE76381\_Human\_Midbrain. Cell-type  
528 transcriptomic profiles were assessed in three ways as per the FUMA analysis pipeline: (1) enrichment of  
529 cell-type transcriptomic profiles within each selected dataset, (2) within-dataset conditionally  
530 independent cell-type transcriptomic profile enrichments and (3) across-dataset cell-type transcriptomic  
531 profile enrichments.<sup>19</sup>

532 For analyses within datasets, cell type conditional significance is evaluated per dataset against  $P$ -  
533 values for all other cell types in that dataset. The output from these analyses identify cell types within a  
534 dataset whose transcriptomic profiles are enriched in a given GWAS independently of the signal from all  
535 other cell-type transcriptomic profiles in the same dataset.

536 Cell types from the same dataset may be similar. Using within-dataset significant cell types  
537 identified above, conditional analysis identifies cell-type transcriptomic profiles enriched in a given  
538 GWAS independent of all other cell types from the selected dataset by setting thresholds for  
539 proportional significance (PS) of the conditional  $P$ -value of a cell type relative to the marginal  $P$ -value. PS  
540 and conditional independence of cell-type pairs indicate that enrichment of these cell types in a given  
541 GWAS is driven by independent genetic signals. The PS of cell type  $a$  given cell type  $b$  is  $PS_{a,b} =$   
542  $\frac{-\log_{10}(P_{a,b})}{-\log_{10}(P_a)}$  where  $P_a$  is the marginal  $P$ -value for cell-type  $a$  using the baseline model of cell-type  
543 enrichment ( $Z_a = \beta_0 + E_a\beta_{Ea} + A\beta_A + B\beta_B + \epsilon$ ) and  $P_{a,b}$  is the conditional  $P$ -value for cell-type  $a$   
544 given the effects of cell-type  $b$  ( $Z_{a,b} = \beta_0 + E_a\beta_{Ea} + E_b\beta_B + A\beta_A + B\beta_B + \epsilon$ ). For a given pair of cell  
545 types,  $PS_{a,b} \geq 0.8$  and  $PS_{b,a} \geq 0.8$  indicates independent genetic signals for cell types  $a$  and  $b$ .

546 Interpretation of additional PS thresholds for each cell type in a given pair can be seen in detail online  
547 (<https://fuma.ctglab.nl/tutorial#celltype>) or in Watanabe et al.<sup>19</sup>

548 Conditional analyses may also be applied across datasets using all possible combination of  
549 within-data set independent signals. Similar to conditioning within a dataset, the cross-data conditional  
550 P-value of a cell type is compared to the cross dataset marginal *P*-value for the same cell type, resulting  
551 in a cross-dataset PS value.

552

### 553 **Medication Use GWAS**

554 Twenty-three GWAS of medication use were evaluated for genetic overlap and causal  
555 relationships with GAD and PTSD. Each medication use GWAS<sup>63</sup> tested for association between  
556 approximately 7 million SNPs and the endorsement of medication in a category (e.g., diuretics, opioids,  
557 antidepressants, etc.) in more than 320,000 European ancestry participants from the UKB. Data may be  
558 accessed here: <https://cnsgenomics.com/content/data>.

559 The SNP- $h^2$  of all 23 medication use GWAS were significantly different from zero; however, one  
560 (L04-Immunosuppressants) was insufficiently powered for genetic correlation ( $h^2$  z-score=3.28) as  
561 recommended by the LDSC developers. Twenty-two suitably powered medication use GWAS ( $h^2$  z-  
562 score>4), were tested for genetic correlation with each trait based on the 1000 Genomes Project LD  
563 reference using LDSC.

564 Latent causal variable (LCV<sup>31</sup>) analysis infers genetic causal relationships between trait pairs  
565 using SNP effect size estimates or Z-scores from GWAS summary association data. The LCV model  
566 assumptions are notably weaker than traditional Mendelian randomization assumptions. First, LCV  
567 assumes that the distribution of effect sizes for a given trait pair represents one distribution of  
568 proportional effects in both traits and a second distribution of effects specific to the outcome trait. In  
569 other words, LCV assumes that symmetry in shared genetic architectures between traits arises from the

570 action of a latent genetic component rather than a non-genetic confounder commonly elucidated by  
571 MR. Second, LCV assumes a single latent factor mediating trait relationships; however, when more than  
572 one latent factor was simulated, LCV was unlikely to detect a causal effect. There are no assumptions of  
573 parametric effect size distributions under the LCV model, but LCV is less well powered for highly  
574 polygenic traits.

575 LCV modelling was implemented in R using the 1000 Genomes Project phase 3 European  
576 reference panel. GWAS summary data were filtered to include only SNPs with minor allele frequencies  
577 greater than 5% and the major histocompatibility region was removed due to its complex LD structure.  
578 LCV model output distinguishes whether genetic correlations support genetic causation and the degree  
579 to which (that is, the  $g\hat{c}p$ ) genetic risk for trait 1 is causal for trait 2. LCV  $g\hat{c}p$  estimates range from 0 to 1  
580 with values closer to 1 indicating full causality between two traits.  $G\hat{c}p$  estimates were only interpreted  
581 for trait pairs where both traits exhibit LCV-calculated  $h^2$  Z-scores  $\geq 7$ .

582

### 583 **Drug Repurposing**

584 Drug repurposing was performed using the Gene2drug computational tool.<sup>64</sup> Gene2drug applies  
585 pathway-set enrichment analysis to a group of gene-sets to reveal pathways of genes up- or down-  
586 regulated by a drug based on gene expression profiles from ConnectivityMap.<sup>65</sup> Given a set of pathways  
587 or gene-sets, Gene2drug reports a  $P$ -value for the Kolmogorov-Smirnov statistic. Each drug is assigned  
588 an enrichment score (“EScore”) to describe the magnitude and direction of dysregulation with positive  
589 EScores indicating upregulation and negative EScores indicating downregulation.

590 To select Gene Ontology terms as standard input for Drug2gene, we positionally mapped the  
591 lead SNP from each genomic risk locus to its nearest gene. When more than one gene mapped to a lead  
592 SNP, we prioritized retention of the gene with the greatest probability of loss of function intolerance.

593 This list of genes was submitted to ShinyGO.<sup>32</sup> We extracted all significant GO terms after multiple  
594 testing correction ( $FDR < 0.05$ ,  $P_{adj} = 4.55 \times 10^{-6}$  based on 72,394 human gene sets) as input for Gene2drug.  
595

### 596 **External Cohort Polygenic Risk Scoring**

597 **Yale-Penn** participants were collected from five study sites in the eastern United States for  
598 studies of the genetics of substance dependence and anxiety traits using the Semi-Structured  
599 Assessment for Drug Dependence and Alcoholism (SSADDA).<sup>27, 28</sup> Participants provided written informed  
600 consent through a protocol approved by the institutional review board at each participating site (Yale  
601 Human Research Protection Program (protocols 9809010515, 0102012183, and 9010005841), University  
602 of Pennsylvania Institutional Review Board, University of Connecticut Health Center Institutional Review  
603 Board, Medical University of South Carolina Institutional Review Board for Human Research, and the  
604 McLean Hospital Institutional Review Board).

605 **The Philadelphia Neurodevelopmental Cohort (PNC)**<sup>25, 26</sup> consists of youths aged 8-21. PNC was  
606 designed to study the genomics of complex pediatric disorders but is not enriched for any specific  
607 disorder; the cohort is considered generally healthy. All participants underwent clinical assessment,  
608 including a neuropsychiatric structured interview and review of electronic medical records. They were  
609 also administered a neuroscience based computerized neurocognitive battery (CNB) and a subsample  
610 underwent neuroimaging. Clinical testing for each participant included (1) GOASSES (a modified version  
611 of the Kiddie-Schedule for Affective Disorders and Schizophrenia), demographic and medical history,  
612 Global Assessment of Functioning, and general interviewer observations, (2) a psychopathology  
613 symptom and criterion-related assessment of mood disorders, anxiety disorders, behavioral disorders,  
614 psychosis spectrum, eating disorders, suicidal thinking and behavior, and treatment history, and (3) an  
615 abbreviated form of the Family Interview for Genetics Studies to assess major domains of  
616 psychopathology in the proband's first-degree relatives. A neurocognitive battery was performed for

617 each PNC proband to measure accuracy and speed of executive control functions, episodic memory,  
618 social cognition, and sensorimotor and motor speed. For a complete list of neurodevelopmental  
619 domains, see [https://www.ncbi.nlm.nih.gov/projects/gap/cgi-bin/study.cgi?study\\_id=phs000607.v3.p2](https://www.ncbi.nlm.nih.gov/projects/gap/cgi-bin/study.cgi?study_id=phs000607.v3.p2).

620 We calculated PRS for each unrelated European participant of the Yale-Penn and PNC, for each  
621 GAD and PTSD symptoms: (i) reexperiencing ( $N_{\text{PNC}}=2,796$  (18% cases);  $N_{\text{Yale-Penn}}=1,117$  (84% cases)) and  
622 self-reported anxiousness ( $N_{\text{PNC}}=3,053$  (58% cases);  $N_{\text{Yale-Penn}}=3,416$  (25% cases)). Per cohort, European  
623 ancestry was defined by clustering principal components with the 1000 Genomes Project European  
624 reference population using the --cluster flag in plink. PRS were calculated in PRSice v2<sup>52</sup> with the  
625 following clumping parameters to select linkage disequilibrium independent variants overlapping  
626 between this study's meta-analysis and the SNP arrays for each cohort:  $r^2=0.001$ ,  $P=1$ , in 10,000-kb  
627 windows. In Yale-Penn, we used between 1,546-1,570 SNPs LD-independent SNPs; in PNC, we used  
628 between 1,501-1,514 LD-independent SNPs. Association between PRS and internalizing symptom  
629 included age, sex, age $\times$ sex, and the first ten within-ancestry principal components as covariates. We  
630 tested 11  $P$ -value thresholds for SNP inclusion:  $5\times 10^{-8}$ ,  $1\times 10^{-7}$ ,  $1\times 10^{-6}$ ,  $1\times 10^{-5}$ ,  $1\times 10^{-4}$ , 0.001, 0.05, 0.1, 0.3,  
631 0.5, 1.

632 GWAS summary association data were retrieved from the Psychiatric Genomics Consortium,<sup>23</sup>  
633 Anxiety NeuroGenetics Study (ANGST<sup>37</sup>), and the FinnGen initiative (Release 4; <http://r4.finnngen.fi/>).  
634 With PRSice v1.25<sup>66</sup> we performed a strict LD-clumping using  $r^2=0.001$ ,  $P=1$ , in 10,000-kb windows and  
635 testing 11  $P$ -value thresholds:  $5\times 10^{-8}$ ,  $1\times 10^{-7}$ ,  $1\times 10^{-6}$ ,  $1\times 10^{-5}$ ,  $1\times 10^{-4}$ , 0.001, 0.05, 0.1, 0.3, 0.5, 1.

636

### 637 **Mendelian Randomization**

638 We performed Mendelian randomization to test the relationship between vasodilator use and  
639 GAD using non-overlapping GWAS summary association data from Levey, et al. (GAD-2 in the MVP<sup>36</sup>)  
640 and Wu, et al. (vasodilator use in the UKB<sup>63</sup>). We performed two analyses in a bidirectional manner (e.g.,

641 GAD-2→vasodilator use and vasodilator use→GAD-2): (i) using LD-independent genome-wide significant  
642 variants from the exposure GWAS ( $P<5\times 10^{-8}$ ) and (ii) using all LD-independent variants from the  
643 exposure GWAS. Similar to prior studies,<sup>67, 68, 69</sup> we attempted a third MR instrument selection  
644 procedure using variants associated with the exposure at a  $P$ -value threshold producing the greatest  
645 polygenic prediction of the outcome (i.e., derived from PRS between exposure and outcome); however,  
646 this approach identified genome-wide significant threshold ( $P<5\times 10^{-8}$ ) as the most suitable threshold to  
647 test vasodilator→GAD-2.

648 MR relies on three assumptions about the genetic instrument: (i) SNPs are associated with the  
649 exposure variable, (ii) SNPs are not associated with confounding factors linking the exposure to the  
650 outcome, and (iii) SNPs are associated with the outcome only through its association with the exposure.  
651 Using the R package `TwoSampleMR`, we tested different MR methods: random-effect inverse variance  
652 weighted (IVW), MR-Egger, weighted median, simple mode, and weighted mode.<sup>70, 71, 72, 73</sup> These  
653 different approaches have different sensitivities with respect to different causal scenarios. We also  
654 conducted sensitivity tests for the presence of horizontal pleiotropy in the genetic instrument (MR-  
655 Egger regression intercept and MR-PRESSO (Pleiotropy RESidual Sum and Outlier) global test) and to  
656 investigate the heterogeneity of variants.<sup>74, 75</sup> FDR multiple testing correction was applied to account for  
657 the number of MR tests performed.

## 658 **Data availability**

659 All data used to generate figures for this study are provided as Supplementary Material. Elastic  
660 net weights are provided as Supplementary Material. GWAS summary data are accessible at  
661 [10.5281/zenodo.4767570](https://zenodo.org/record/4767570). This research has been conducted using the UK Biobank Resource  
662 (application reference no. 58146) and is available to bona fide researchers through approved access.  
663 Out-sample polygenic risk scoring utilized the Yale-Penn cohort (dbGaP Study Accession:

664 phs000425.v1.p1) and the Philadelphia Neurodevelopmental Cohort (dbGaP Study Accession:  
665 phs000607.v3.p2). The dbGAP data used herein is available for approved access download from dbGAP  
666 data request portal.

## 667 **Code availability**

668 Previously developed pipelines were used to produce the results for this study. No custom code  
669 was developed to generate the data used to draw any of our conclusions.

## 670 **References**

- 671 1. Howard DM, *et al.* Genome-wide meta-analysis of depression identifies 102 independent  
672 variants and highlights the importance of the prefrontal brain regions. *Nat Neurosci* **22**, 343-352  
673 (2019).
- 674 2. Levey DF, *et al.* Reproducible Genetic Risk Loci for Anxiety: Results From approximately 200,000  
675 Participants in the Million Veteran Program. *Am J Psychiatry* **177**, 223-232 (2020).
- 676 3. Levey DF, *et al.* GWAS of Depression Phenotypes in the Million Veteran Program and Meta-  
677 analysis in More than 1.2 Million Participants Yields 178 Independent Risk Loci. *medRxiv*,  
678 2020.2005.2018.20100685 (2020).
- 681 4. Nievergelt CM, *et al.* International meta-analysis of PTSD genome-wide association studies  
682 identifies sex- and ancestry-specific genetic risk loci. *Nat Commun* **10**, 4558 (2019).
- 684 5. Stein MB, *et al.* Genomic Characterization of Posttraumatic Stress Disorder in a Large US Military  
685 Veteran Sample. *Nature Genetics*, 764001 (2020).
- 687 6. Wray NR, *et al.* Genome-wide association analyses identify 44 risk variants and refine the  
688 genetic architecture of major depression. *Nat Genet* **50**, 668-681 (2018).
- 691 7. The “All of Us” Research Program. *New England Journal of Medicine* **381**, 668-676 (2019).
- 692



- 693 8. Bycroft C, *et al.* The UK Biobank resource with deep phenotyping and genomic data. *Nature* **562**,  
694 203-209 (2018).
- 695  
696 9. Gaziano JM, *et al.* Million Veteran Program: A mega-biobank to study genetic influences on  
697 health and disease. *J Clin Epidemiol* **70**, 214-223 (2016).
- 698  
699 10. Nagai A, *et al.* Overview of the BioBank Japan Project: Study design and profile. *J Epidemiol* **27**,  
700 S2-S8 (2017).
- 701  
702 11. Davis KAS, *et al.* Mental health in UK Biobank – development, implementation and results from  
703 an online questionnaire completed by 157 366 participants: a reanalysis. *BJPsych Open* **6**, e18  
704 (2020).
- 705  
706 12. Purves KL, *et al.* A major role for common genetic variation in anxiety disorders. *Mol Psychiatry*,  
707 (2019).
- 708  
709 13. Lebovitch DS, Johnson JS, Dueñas HR, Huckins LM. Phenotype Risk Scores: moving beyond  
710 ‘cases’ and ‘controls’ to classify psychiatric disease in hospital-based biobanks. *medRxiv*,  
711 2021.2001.2025.21249615 (2021).
- 712  
713 14. Uçar MK, Nour M, Sindi H, Polat K. The Effect of Training and Testing Process on Machine  
714 Learning in Biomedical Datasets. *Mathematical Problems in Engineering* **2020**, 2836236 (2020).
- 715  
716 15. Özkale MR. The red indicator and corrected VIFs in generalized linear models. *Communications*  
717 *in Statistics - Simulation and Computation*, 1-27 (2019).
- 718  
719 16. Turley P, *et al.* Multi-trait analysis of genome-wide association summary statistics using MTAG.  
720 *Nat Genet* **50**, 229-237 (2018).
- 721  
722 17. Wendt FR, Pathak GA, Lencz T, Krystal JH, Gelernter J, Polimanti R. Multivariate genome-wide  
723 analysis of education, socioeconomic status, and brain phenome. *Nature Human Behavior*,  
724 <https://doi.org/10.1038/s41562-41020-00980-y> (2020).
- 725  
726 18. Zhu Z, *et al.* Causal associations between risk factors and common diseases inferred from GWAS  
727 summary data. *Nat Commun* **9**, 224 (2018).
- 728  
729 19. Watanabe K, Umicevic Mirkov M, de Leeuw CA, van den Heuvel MP, Posthuma D. Genetic  
730 mapping of cell type specificity for complex traits. *Nat Commun* **10**, 3222 (2019).
- 731  
732 20. Walsh RM, *et al.* Phf8 loss confers resistance to depression-like and anxiety-like behaviors in  
733 mice. *Nature Communications* **8**, 15142 (2017).

- 734  
735 21. Kim HJ, *et al.* Histone demethylase PHF2 activates CREB and promotes memory consolidation.  
736 *EMBO Rep* **20**, e45907 (2019).
- 737  
738 22. Lv C, *et al.* Low-dose IL-2 therapy compensates for metabolic shifts and reverses anxiety-like  
739 behavior in PD-1 deficiency-induced autoimmunity. *Cellular & Molecular Immunology*, (2020).
- 740  
741 23. Duncan LE, *et al.* Largest GWAS of PTSD (N 070) yields genetic overlap with schizophrenia and  
742 sex differences in heritability. *Mol Psychiatry* **23**, 666-673 (2018).
- 743  
744 24. Otowa T, *et al.* Meta-analysis of genome-wide association studies of anxiety disorders. *Mol*  
745 *Psychiatry* **21**, 1391-1399 (2016).
- 746  
747 25. Calkins ME, *et al.* The Philadelphia Neurodevelopmental Cohort: constructing a deep  
748 phenotyping collaborative. *J Child Psychol Psychiatry* **56**, 1356-1369 (2015).
- 749  
750 26. Robinson EB, *et al.* The genetic architecture of pediatric cognitive abilities in the Philadelphia  
751 Neurodevelopmental Cohort. *Mol Psychiatry* **20**, 454-458 (2015).
- 752  
753 27. Pierucci-Lagha A, *et al.* Reliability of DSM-IV diagnostic criteria using the semi-structured  
754 assessment for drug dependence and alcoholism (SSADDA). *Drug Alcohol Depend* **91**, 85-90  
755 (2007).
- 756  
757 28. Pierucci-Lagha A, *et al.* Diagnostic reliability of the Semi-structured Assessment for Drug  
758 Dependence and Alcoholism (SSADDA). *Drug Alcohol Depend* **80**, 303-312 (2005).
- 759  
760 29. Zhong S, *et al.* A single-cell RNA-seq survey of the developmental landscape of the human  
761 prefrontal cortex. *Nature* **555**, 524-528 (2018).
- 762  
763 30. Bulik-Sullivan BK, *et al.* LD Score regression distinguishes confounding from polygenicity in  
764 genome-wide association studies. *Nat Genet* **47**, 291-295 (2015).
- 765  
766 31. O'Connor LJ, Price AL. Distinguishing genetic correlation from causation across 52 diseases and  
767 complex traits. *Nat Genet* **50**, 1728-1734 (2018).
- 768  
769 32. Ge SX, Jung D, Yao R. ShinyGO: a graphical gene-set enrichment tool for animals and plants.  
770 *Bioinformatics* **36**, 2628-2629 (2020).
- 771  
772 33. Brunet A, Saumier D, Liu A, Streiner DL, Tremblay J, Pitman RK. Reduction of PTSD Symptoms  
773 With Pre-Reactivation Propranolol Therapy: A Randomized Controlled Trial. *Am J Psychiatry* **175**,  
774 427-433 (2018).

- 775  
776 34. Steenen SA, van Wijk AJ, van der Heijden GJ, van Westrhenen R, de Lange J, de Jongh A.  
777 Propranolol for the treatment of anxiety disorders: Systematic review and meta-analysis. *J*  
778 *Psychopharmacol* **30**, 128-139 (2016).
- 779  
780 35. Chen J-j, *et al.* Urinary biomarker panel for diagnosing patients with depression and anxiety  
781 disorders. *Translational Psychiatry* **8**, 192 (2018).
- 782  
783 36. Levey DF, *et al.* Reproducible Genetic Risk Loci for Anxiety: Results From approximately 200,000  
784 Participants in the Million Veteran Program. *Am J Psychiatry*, appiajp201919030256 (2020).
- 785  
786 37. Meier SM, *et al.* Genetic Variants Associated With Anxiety and Stress-Related Disorders: A  
787 Genome-Wide Association Study and Mouse-Model Study. *JAMA Psychiatry* **76**, 924-932 (2019).
- 788  
789 38. Gelernter J, *et al.* Genome-wide association study of post-traumatic stress disorder  
790 reexperiencing symptoms in >165,000 US veterans. *Nat Neurosci* **22**, 1394-1401 (2019).
- 791  
792 39. Hill WD, *et al.* Genetic contributions to two special factors of neuroticism are associated with  
793 affluence, higher intelligence, better health, and longer life. *Mol Psychiatry*, (2019).
- 794  
795 40. Hill WD, *et al.* Genome-wide analysis identifies molecular systems and 149 genetic loci  
796 associated with income. *Nature Communications* **10**, 5741 (2019).
- 797  
798 41. Russo AC, Fingerhut EC. Consistency of Self-Reported Neurocognitive Symptoms, Post-Traumatic  
799 Stress Disorder Symptoms, and Concussive Events From End of First Deployment to Veteran  
800 Health Administration Comprehensive Traumatic Brain Injury Evaluation by Operations Enduring  
801 Freedom/Iraqi Freedom/New Dawn Veterans. *Arch Clin Neuropsychol* **32**, 184-197 (2017).
- 802  
803 42. Beesdo K, Knappe S, Pine DS. Anxiety and anxiety disorders in children and adolescents:  
804 developmental issues and implications for DSM-V. *Psychiatr Clin North Am* **32**, 483-524 (2009).
- 805  
806 43. Aupperle RL, *et al.* Dorsolateral prefrontal cortex activation during emotional anticipation and  
807 neuropsychological performance in posttraumatic stress disorder. *Arch Gen Psychiatry* **69**, 360-  
808 371 (2012).
- 809  
810 44. Philip NS, Barredo J, van 't Wout-Frank M, Tyrka AR, Price LH, Carpenter LL. Network  
811 Mechanisms of Clinical Response to Transcranial Magnetic Stimulation in Posttraumatic Stress  
812 Disorder and Major Depressive Disorder. *Biol Psychiatry* **83**, 263-272 (2018).
- 813  
814 45. Kang HJ, *et al.* Spatio-temporal transcriptome of the human brain. *Nature* **478**, 483-489 (2011).
- 815

- 816 46. Del Giacco SR, *et al.* The asthma-anxiety connection. *Respir Med* **120**, 44-53 (2016).  
817
- 818 47. Takeshita J, *et al.* Association of Racial/Ethnic and Gender Concordance Between Patients and  
819 Physicians With Patient Experience Ratings. *JAMA Netw Open* **3**, e2024583 (2020).
- 820
- 821 48. Kroenke K, Spitzer RL, Williams JB, Löwe B. The Patient Health Questionnaire Somatic, Anxiety,  
822 and Depressive Symptom Scales: a systematic review. *Gen Hosp Psychiatry* **32**, 345-359 (2010).
- 823
- 824 49. Lang AJ, Stein MB. An abbreviated PTSD checklist for use as a screening instrument in primary  
825 care. *Behav Res Ther* **43**, 585-594 (2005).
- 826
- 827 50. Hyde CL, *et al.* Identification of 15 genetic loci associated with risk of major depression in  
828 individuals of European descent. *Nat Genet* **48**, 1031-1036 (2016).
- 829
- 830 51. Friedman J, Hastie T, Tibshirani R. Regularization Paths for Generalized Linear Models via  
831 Coordinate Descent. *J Stat Softw* **33**, 1-22 (2010).
- 832
- 833 52. Choi SW, O'Reilly PF. PRSice-2: Polygenic Risk Score software for biobank-scale data. *Gigascience*  
834 **8**, (2019).
- 835
- 836 53. Fox J, Weisberg S. Visualizing Fit and Lack of Fit in Complex Regression Models with Predictor  
837 Effect Plots and Partial Residuals. *2018* **87**, 27 (2018).
- 838
- 839 54. Imdadullah M, Aslam M, S. A. mctest: An R Package for Detection of Collinearity among  
840 Regressors. *The R Journal* **8**, 495-505 (2016).
- 841
- 842 55. Willer CJ, Li Y, Abecasis GR. METAL: fast and efficient meta-analysis of genomewide association  
843 scans. *Bioinformatics* **26**, 2190-2191 (2010).
- 844
- 845 56. Wang G, Sarkar A, Carbonetto P, Stephens M. A simple new approach to variable selection in  
846 regression, with application to genetic fine mapping. *Journal of the Royal Statistical Society:  
847 Series B (Statistical Methodology)* **82**, 1273-1300 (2020).
- 848
- 849 57. Kessler RC, *et al.* The global burden of mental disorders: an update from the WHO World Mental  
850 Health (WMH) surveys. *Epidemiol Psychiatr Soc* **18**, 23-33 (2009).
- 851
- 852 58. Yehuda R, *et al.* Post-traumatic stress disorder. *Nat Rev Dis Primers* **1**, 15057 (2015).
- 853
- 854 59. Hasin DS, *et al.* Epidemiology of Adult DSM-5 Major Depressive Disorder and Its Specifiers in the  
855 United States. *JAMA Psychiatry* **75**, 336-346 (2018).

- 856  
857 60. Watanabe K, Taskesen E, van Bochoven A, Posthuma D. Functional mapping and annotation of  
858 genetic associations with FUMA. *Nat Commun* **8**, 1826 (2017).
- 859  
860 61. The GTEx Consortium atlas of genetic regulatory effects across human tissues. *Science* **369**,  
861 1318-1330 (2020).
- 862  
863 62. Li M, *et al.* Integrative functional genomic analysis of human brain development and  
864 neuropsychiatric risks. *Science* **362**, (2018).
- 865  
866 63. Wu Y, *et al.* Genome-wide association study of medication-use and associated disease in the UK  
867 Biobank. *Nat Commun* **10**, 1891 (2019).
- 868  
869 64. Napolitano F, *et al.* gene2drug: a computational tool for pathway-based rational drug  
870 repositioning. *Bioinformatics* **34**, 1498-1505 (2018).
- 871  
872 65. Lamb J, *et al.* The Connectivity Map: Using Gene-Expression Signatures to Connect Small  
873 Molecules, Genes, and Disease. *Science* **313**, 1929-1935 (2006).
- 874  
875 66. Euesden J, Lewis CM, O'Reilly PF. PRSice: Polygenic Risk Score software. *Bioinformatics* **31**, 1466-  
876 1468 (2015).
- 877  
878 67. Carvalho CM, *et al.* Investigating Causality Between Blood Metabolites and Emotional and  
879 Behavioral Responses to Traumatic Stress: a Mendelian Randomization Study. *Mol Neurobiol* **57**,  
880 1542-1552 (2020).
- 881  
882 68. Polimanti R, *et al.* Association of Economic Status and Educational Attainment With  
883 Posttraumatic Stress Disorder: A Mendelian Randomization Study. *JAMA Netw Open* **2**, e193447  
884 (2019).
- 885  
886 69. Wendt FR, Muniz Carvalho C, Pathak GA, Gelernter J, Polimanti R. Deciphering the Biological  
887 Mechanisms Underlying the Genome-Wide Associations between Computerized Device Use and  
888 Psychiatric Disorders. *J Clin Med* **8**, (2019).
- 889  
890 70. Bowden J, Davey Smith G, Haycock PC, Burgess S. Consistent Estimation in Mendelian  
891 Randomization with Some Invalid Instruments Using a Weighted Median Estimator. *Genet*  
892 *Epidemiol* **40**, 304-314 (2016).
- 893  
894 71. Bowden J, Del Greco MF, Minelli C, Davey Smith G, Sheehan N, Thompson J. A framework for the  
895 investigation of pleiotropy in two-sample summary data Mendelian randomization. *Stat Med* **36**,  
896 1783-1802 (2017).

- 897  
898 72. Hartwig FP, Davey Smith G, Bowden J. Robust inference in summary data Mendelian  
899 randomization via the zero modal pleiotropy assumption. *Int J Epidemiol* **46**, 1985-1998 (2017).  
900  
901 73. Zhao Q, Wang J, Hemani G, Bowden J, Small DS. Statistical inference in two-sample summary data  
902 Mendelian randomization using robust adjusted profile score. *arXiv*, (2018).  
903  
904 74. Burgess S, Bowden J, Fall T, Ingelsson E, Thompson SG. Sensitivity Analyses for Robust Causal  
905 Inference from Mendelian Randomization Analyses with Multiple Genetic Variants.  
906 *Epidemiology* **28**, 30-42 (2017).  
907  
908 75. Verbanck M, Chen CY, Neale B, Do R. Detection of widespread horizontal pleiotropy in causal  
909 relationships inferred from Mendelian randomization between complex traits and diseases. *Nat*  
910 *Genet* **50**, 693-698 (2018).

911  
912

## 913 **Acknowledgements**

914 This research has been conducted using the UK Biobank Resource (application reference no.  
915 58146). The authors thank the research participants and employees of the UK Biobank for making this  
916 work possible. This study was supported by National Institutes of Health (R21 DC018098, R21 DA047527,  
917 R33 DA047527, and F32 MH122058) and a Faculty Scholar Award from the Seaver Foundation:  
918 "Analytical Genomics of Vulnerable Populations." The funders had no role in study design, data  
919 collection and analysis, decision to publish, or preparation of the manuscript.

## 920 **Author Contributions**

921 F.R.W and R.P. conceived the study design; F.R.W. performed phenotype prediction,  
922 demographic comparisons, multi-trait conditioning, genome-wide association study meta-analyses,  
923 causal inference analysis, functional annotation, and PRS in the PNC; G.A.P. performed fine mapping;

924 J.D.D. assisted with multi-trait conditioning; F.D.A. performed drug repurposing analyses; D.K.  
925 performed genetic correlation; B.C.M. performed GWAS statistics-level PRS; F.R.W., G.A.P., J.D.D., D.S.L.,  
926 D.F.L, M.B.S., H.R.K., K.C.K., J.G., L.M.H., and R.P. contributed to data interpretation; F.R.W., G.A.P. and  
927 R.P. contributed to data visualization and presentation; F.R.W. drafted the original manuscript. All  
928 authors critically evaluated and revised the manuscript.

929

## 930 **Competing Interests**

931 Dr. Kranzler is a member of an advisory board for Dicerna Pharmaceuticals, a consultant to Sophrosyne  
932 Pharmaceuticals, a member of the American Society of Clinical Psychopharmacology's Alcohol Clinical  
933 Trials Initiative, which for the past three years was supported by AbbVie, Alkermes, Amygdala  
934 Neurosciences, Arbor, Dicerna, Ethypharm, Indivior, Lilly, Lundbeck, Otsuka, and Pfizer, and is paid for  
935 his editorial work on the journal Alcoholism: Clinical and Experimental Research. Drs. Kranzler and  
936 Gelernter are named as inventors on PCT patent application #15/878,640 entitled: "Genotype-guided  
937 dosing of opioid agonists," filed January 24, 2018. Dr. Stein is paid for his editorial work on the journals  
938 Biological Psychiatry and Depression and Anxiety, and the health professional reference Up-To-Date; he  
939 has also in the past 3 years received consulting income from Actelion, Acadia Pharmaceuticals, Aptinyx,  
940 Bionomics, BioXcel Therapeutics, Clexio, EmpowerPharm, GW Pharmaceuticals, Janssen, Jazz  
941 Pharmaceuticals, and Roche/Genentech, and has stock options in Oxeia Biopharmaceuticals and  
942 Epivario. Drs. Polimanti and Gelernter are paid for their editorial work on the journal Complex  
943 Psychiatry. The other authors have no competing interests to report.

944

## In-Text Figures

### **Fig. 1 | Study design for understanding the genetic architectures of internalizing co-phenomes.**

Features (i.e., comorbid phenotypes) were correlated with GAD-7, PCL-6, and PHQ-9. Outcomes were predicted using elastic net regression in two ways: (i) each quantitative outcome was predicted as the dependent variable in elastic net regression and (ii) elastic net regression weights were used to calculate a co-phenome risk score.

**Fig 2. | Probability of MHQ survey participation.** (a) Probability of participating in the MHQ survey based on neuroticism score and three samplings of GAD-7 (low = 7, medium = 14, high = 21). In (b), the relationship between GAD-7 and neuroticism scores. All data describing these effects are provided in Supplementary Table 5.

**Fig. 3 | Verifying the concordant genetic architectures of true and predicted internalizing outcomes. a,** SNP-heritability ( $h^2$ ) of each internalizing outcome and the current largest unrelated sampling of a corresponding phenotype (GAD-2, PCL-17, and broad depression) after multi-trait conditioning with neuroticism. Each data point is the trait  $h^2$  point estimate and error bars represent the 95% confidence interval (CI) associated with each estimate. **b,** Genetic correlation ( $r_g$ ) within and between internalizing outcomes derived from the Mental Health Questionnaire (MHQ responders) and those predicted in the MHQ non-responders of the UKB before (bottom left triangle) and after (top right triangle) multi-trait conditioning with neuroticism. Pale text indicates a phenotype from the MHQ non-responders and dark text indicates a phenotype from the MHQ responders. Each  $r_g$  heatmap contains a positive control with



positive  $r_g$  (largest Million Veteran Program (MVP) corresponding phenotype) and positive control with negative  $r_g$  (subjective well-being) phenotype. All  $r_g$ s survive multiple testing correction ( $FDR < 0.05$ ).

**Fig. 4 | SNP annotation of GAD and PTSD GWAS.** The bottom row shows Manhattan plots for each trait. Two horizontal dashed lines in each plot show the genome-wide significance threshold per phenotype ( $P < 5 \times 10^{-8}$ ) and study-wide ( $P_{adj} < 1.25 \times 10^{-8}$ ). Above each Manhattan plot are Combined Annotation Dependent Depletion (CADD) scores and RegulomeDB scores for each genome-wide significant locus.

**Fig. 5 | Out-sample polygenic prediction of relevant phenotypes.** Maximum observed association ( $R^2$ ) between polygenic risk scores (PRS) for GAD and PTSD outcomes in this study and out-sample GAD and PTSD phenotypes from large consortia (ANGST, FinnGen, and PGC using summary-level PRS in PRSice v1.25) and individual-level cohorts informative for mental health outcomes (Philadelphia Neurodevelopmental Cohort (PNC) and Yale-Penn using PRSice v2).

**Fig. 6 | Prenatal transcriptomic signatures of GAD and PTSD outcomes.** **a**, Enrichment of transcriptomic profiles from prenatal tissue based on BrainSpan 11 developmental stages. Each bar represents the results from one-sided tests for enrichment of a given transcriptomic profile. Effect size estimates ( $\beta$ ) are color coded. Dashed horizontal lines indicate the significance threshold after multiple testing correction ( $FDR < 0.05$ ) across all tests. **b**, Manhattan plots of Hi-C coupled gene-based association studies of GAD and PTSD in fetal paracentral tissue. Each data point represents a single gene positionally aligned across each autosome. The height of each point along the y-axis indicates the significance of association between gene and phenotype with each colored data point indicating a significantly associated gene after analysis-wide multiple testing correction ( $P < 9.43 \times 10^{-7}$ ). A subset of genes are labeled and all genes are provided in Supplementary Table 16.

# Truth (MHQ) Data

Phenome-wide correlates

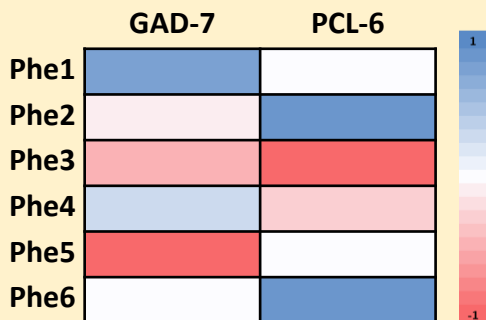

## Elastic Net Regression and Feature Weights

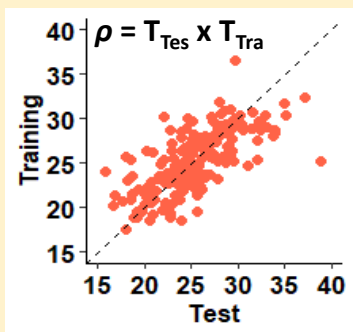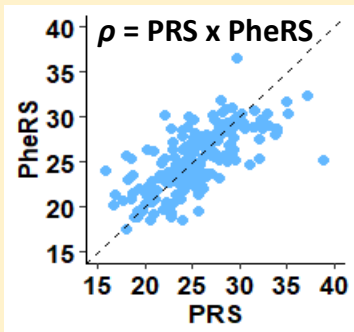

GWAS

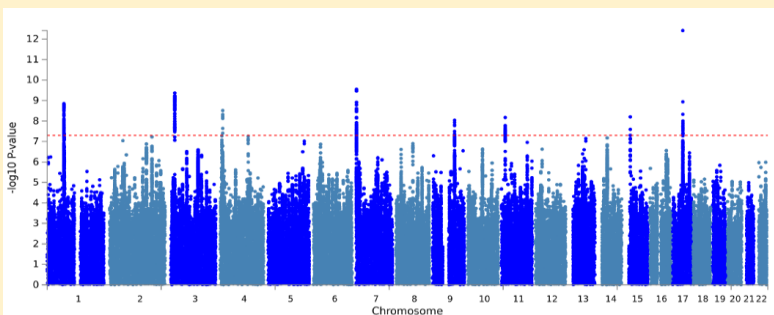

# Unknown (no MHQ) Data

Feature Weights Applied to No-MHQ Data

GWAS

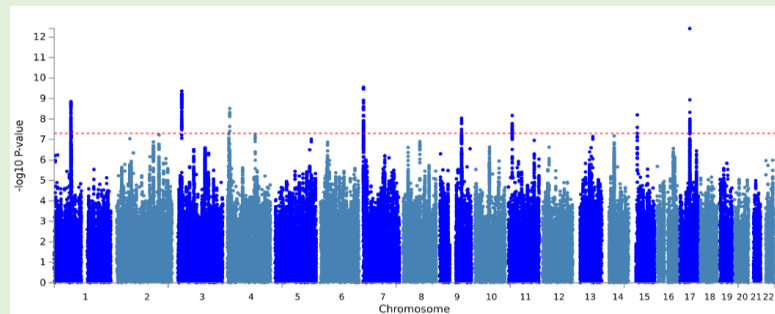

## Multi-trait Conditioning

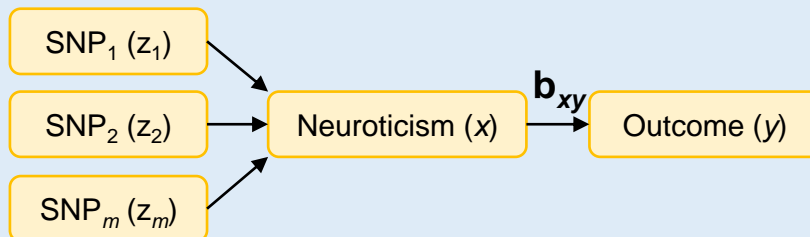

## Meta-Analyzed Discoveries

- Liability SNPs
- Genes of interest
- Brain tissue transcriptomics
- Cell-type transcriptomics
- Drug repositioning

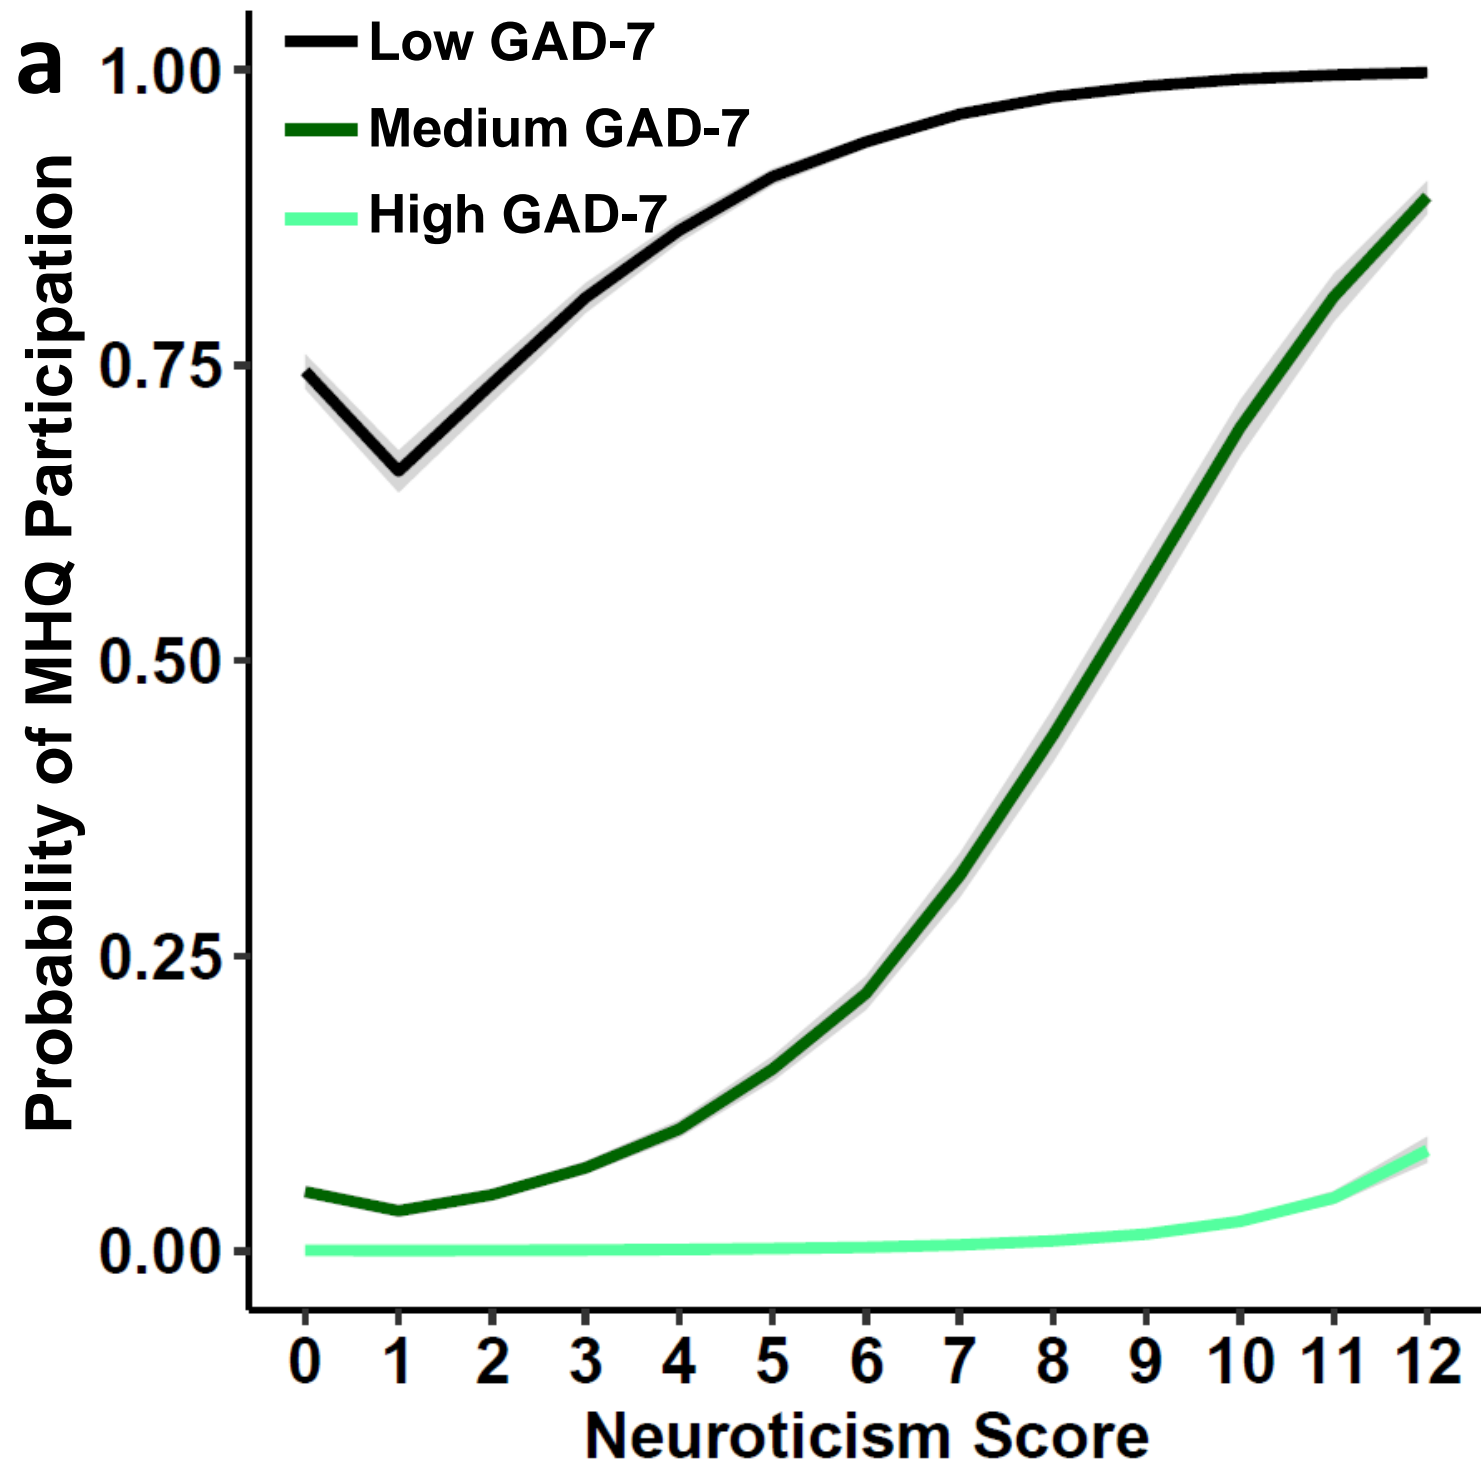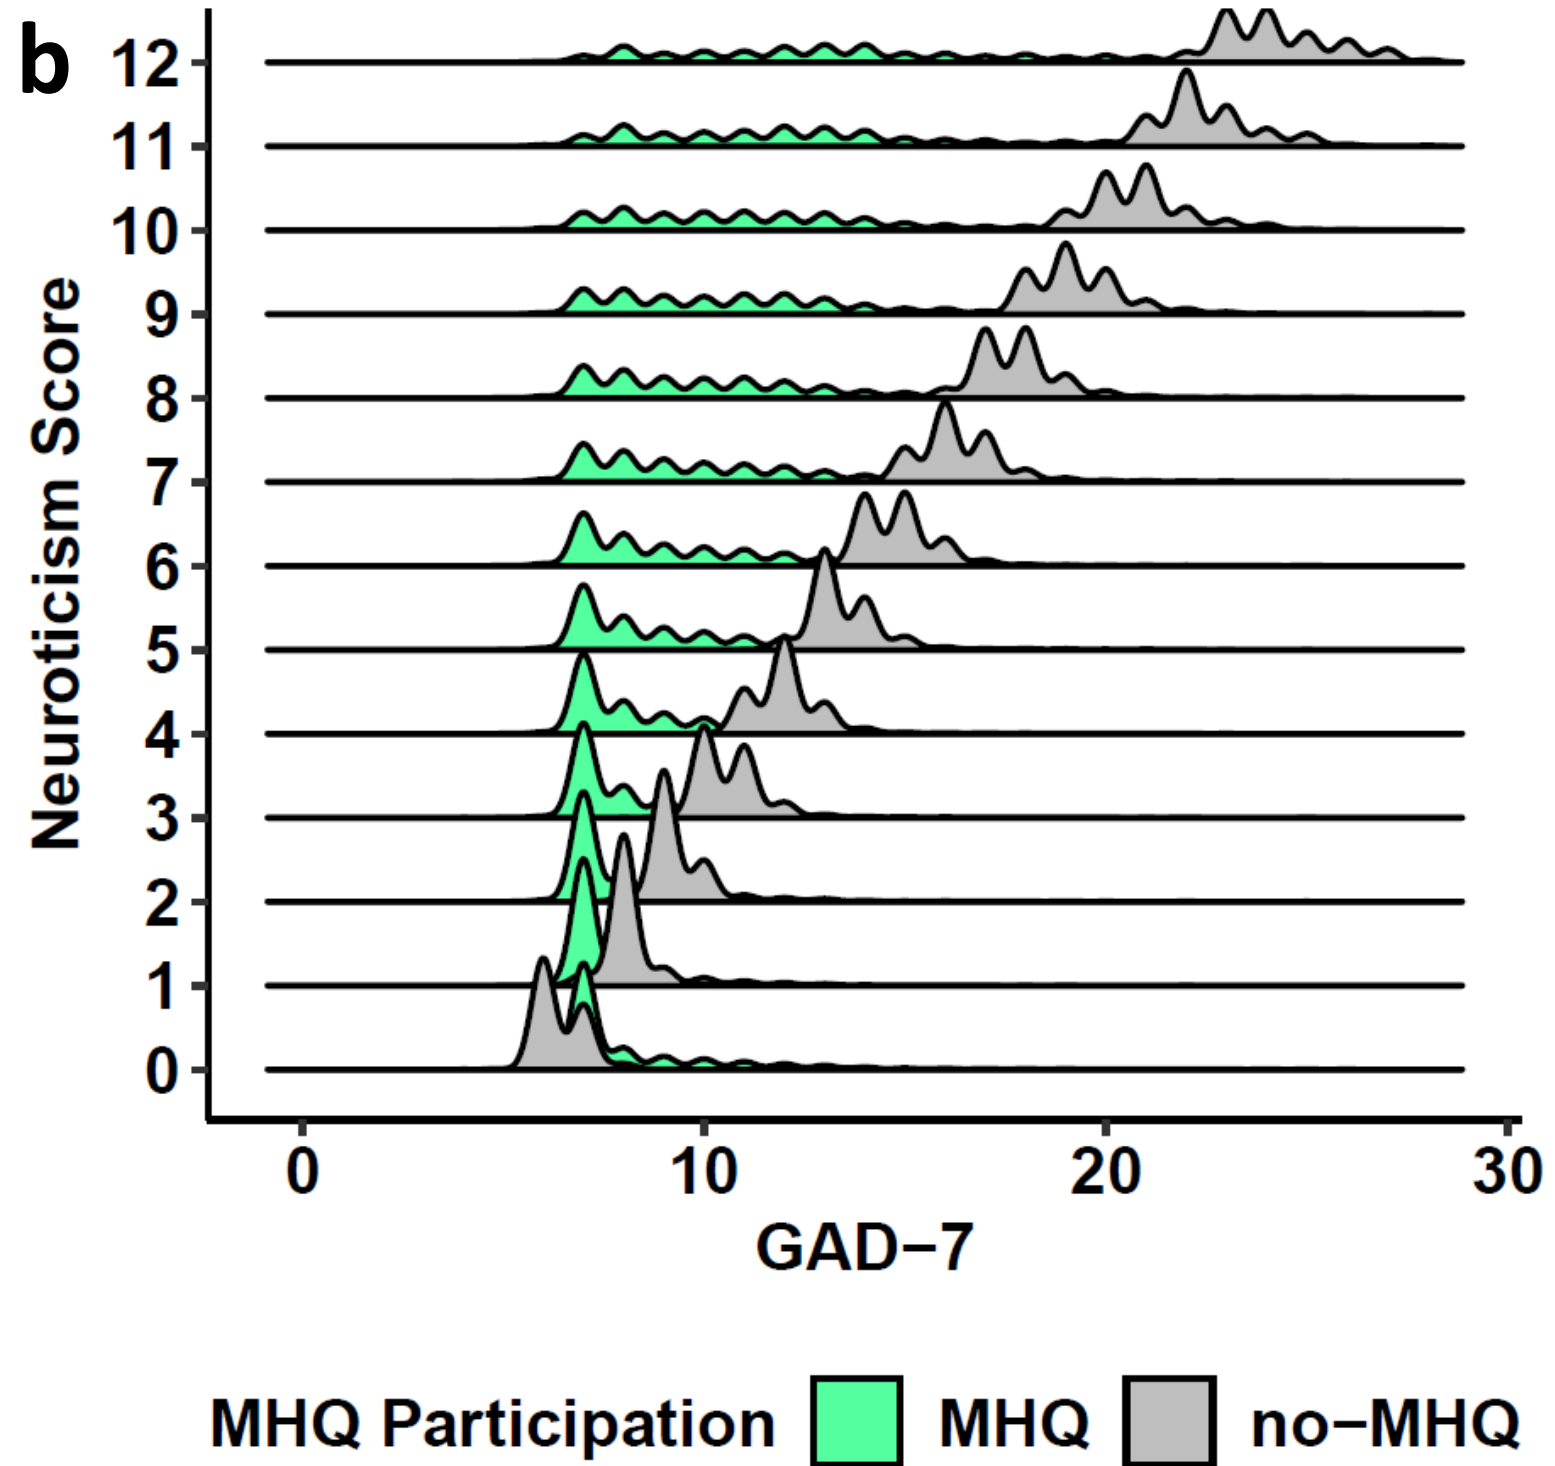

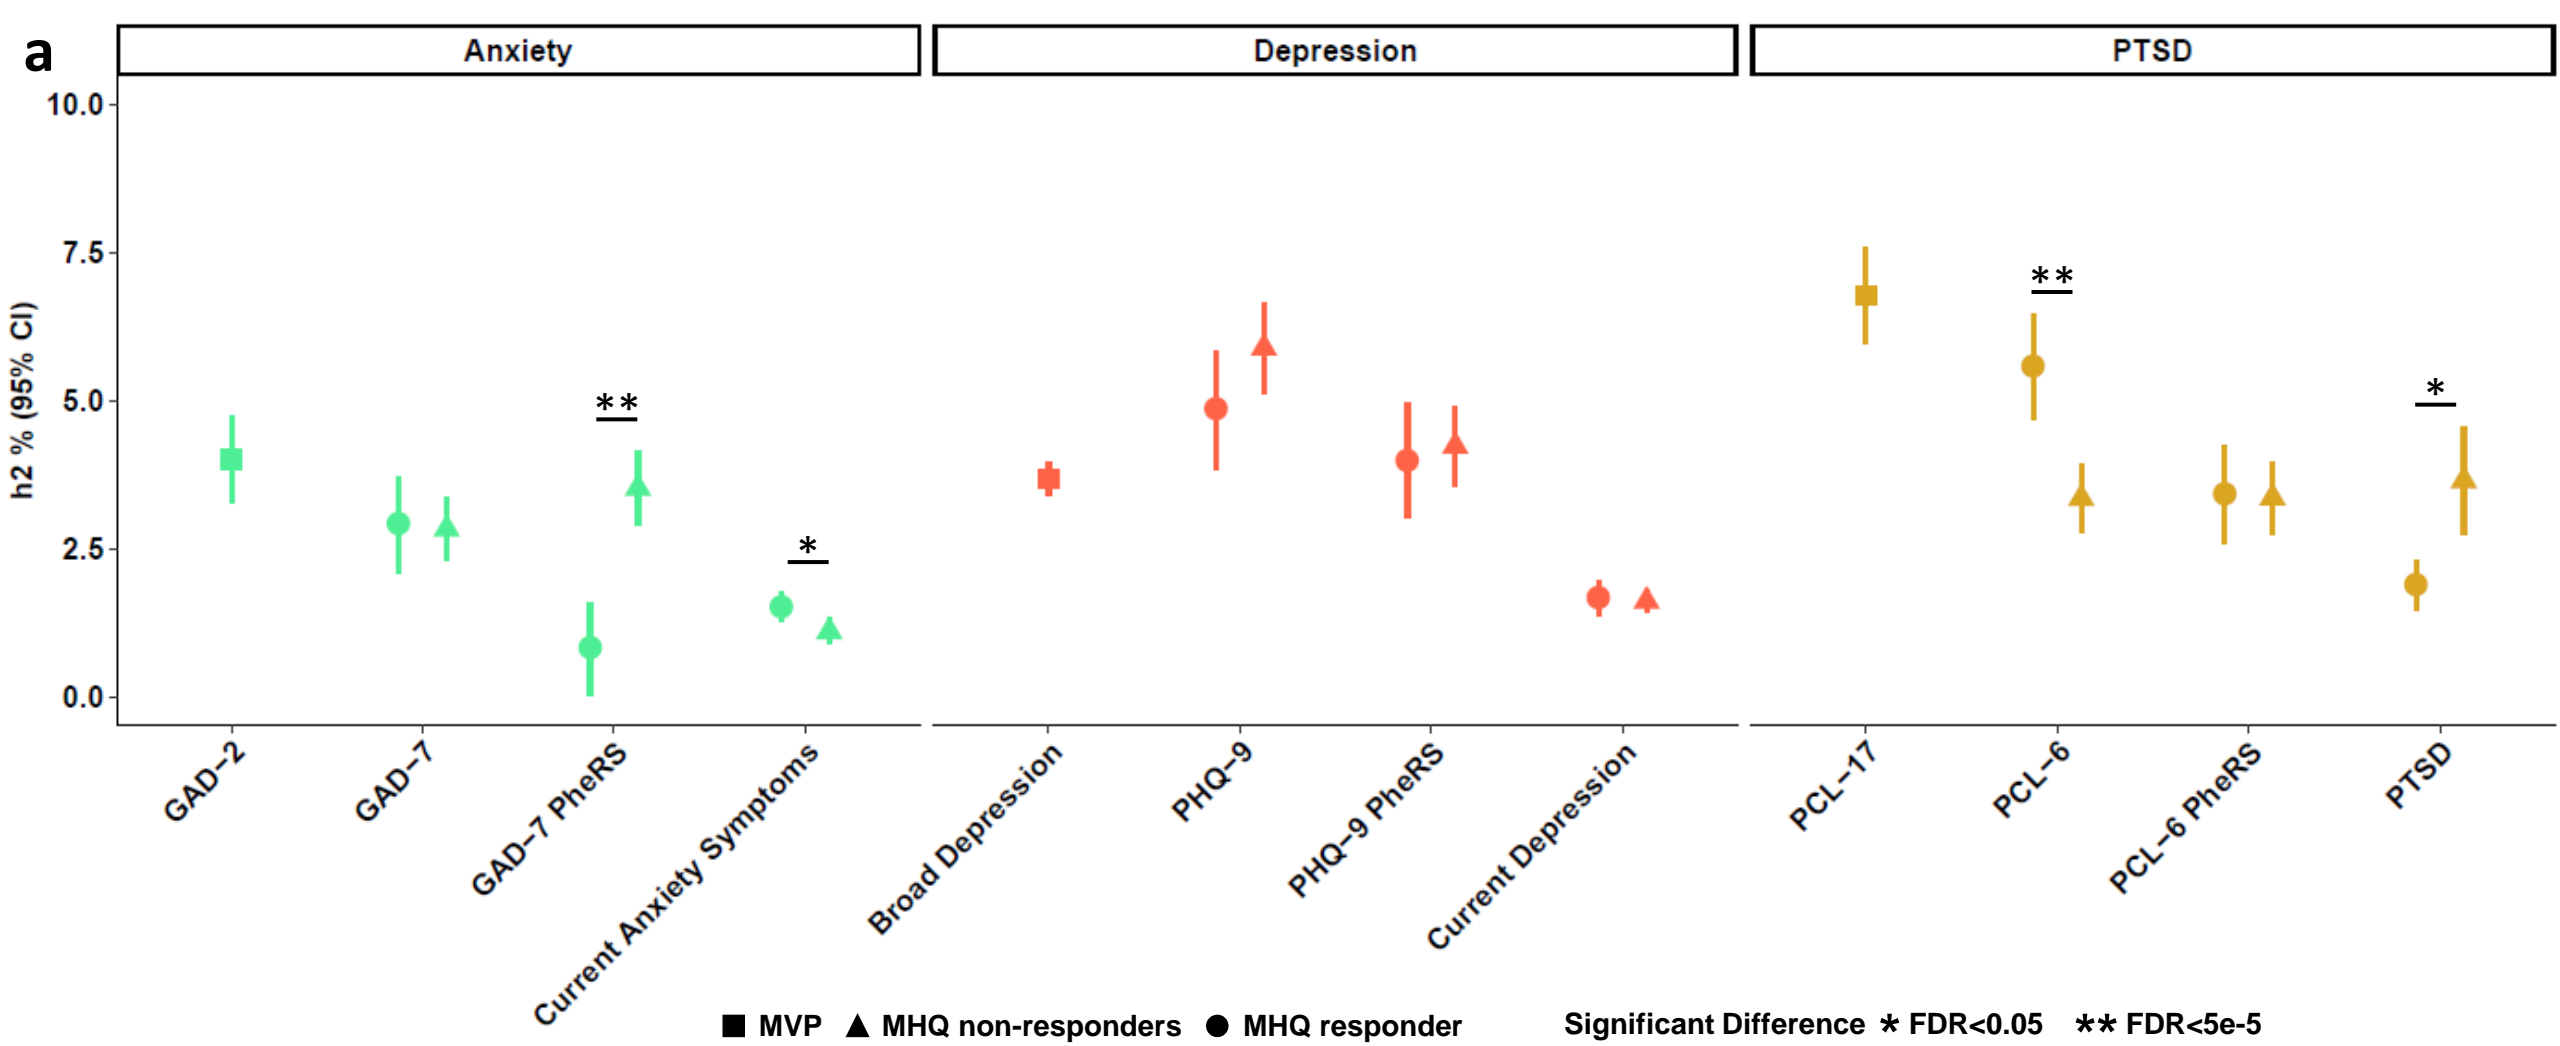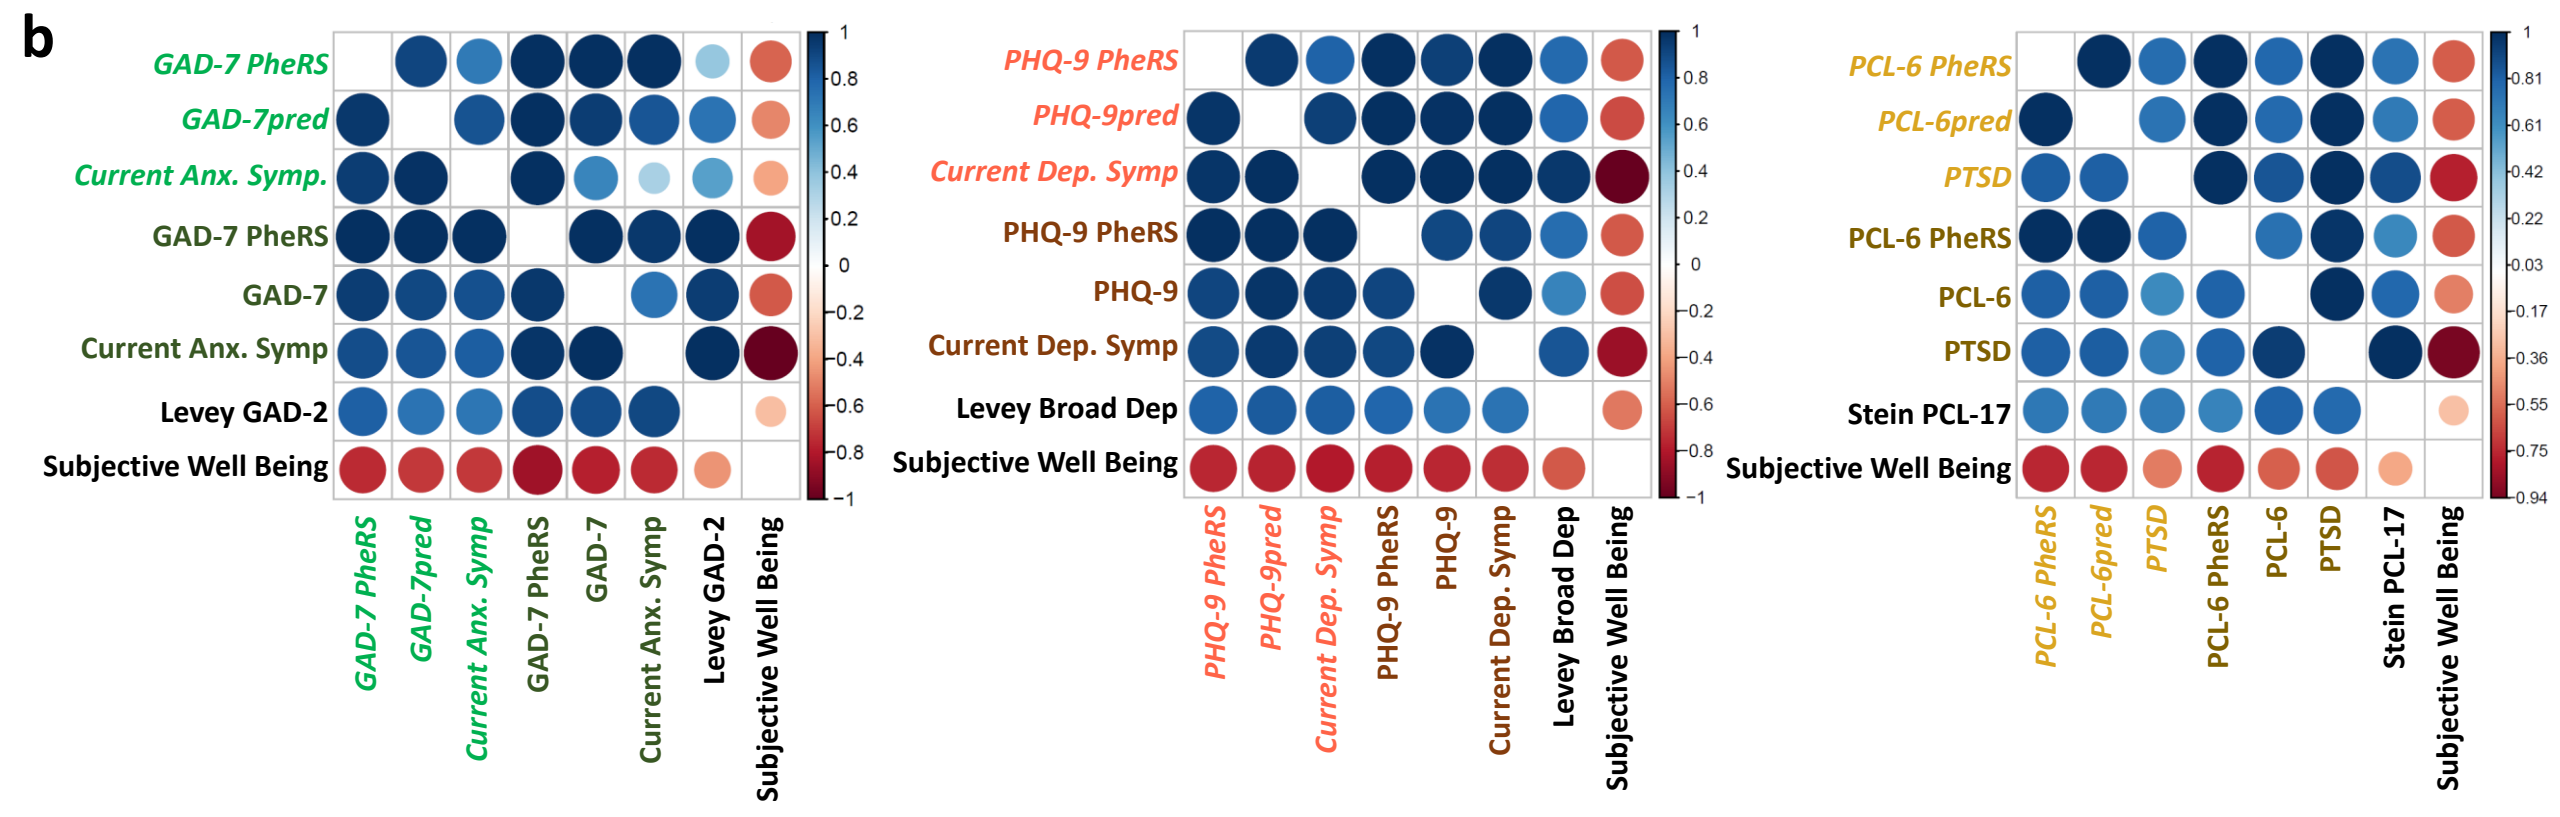

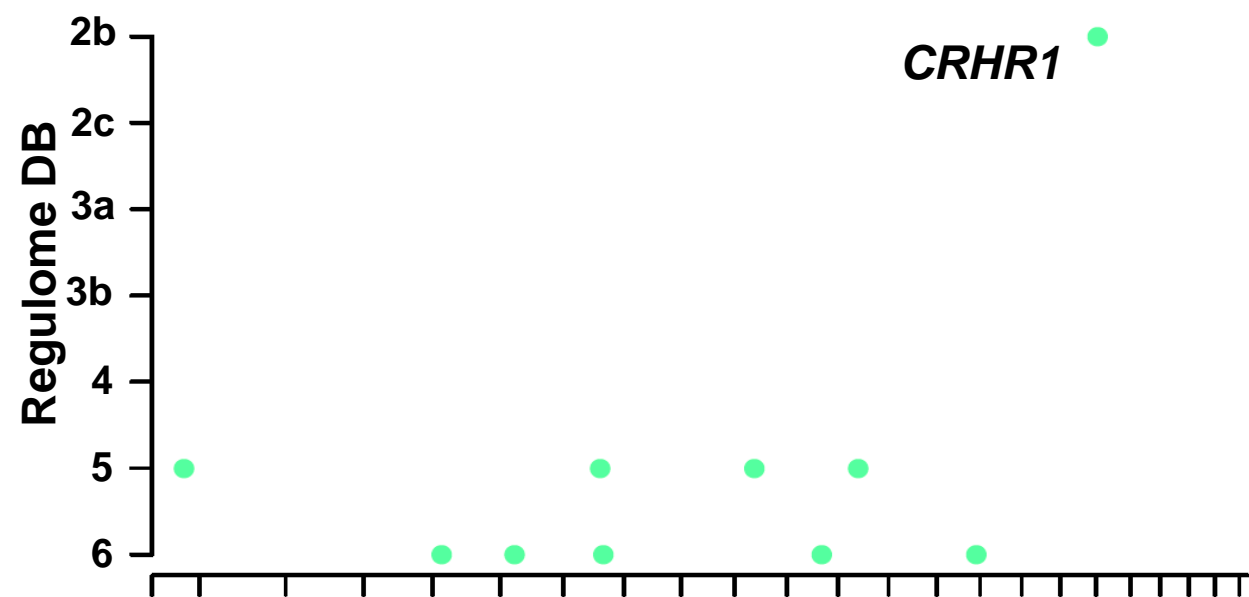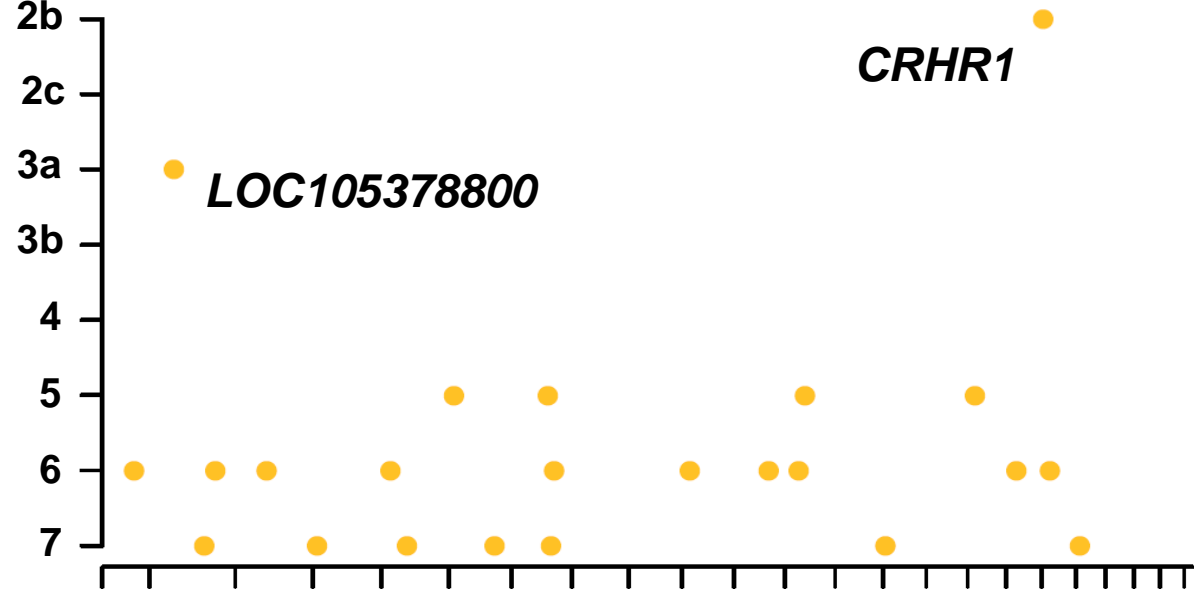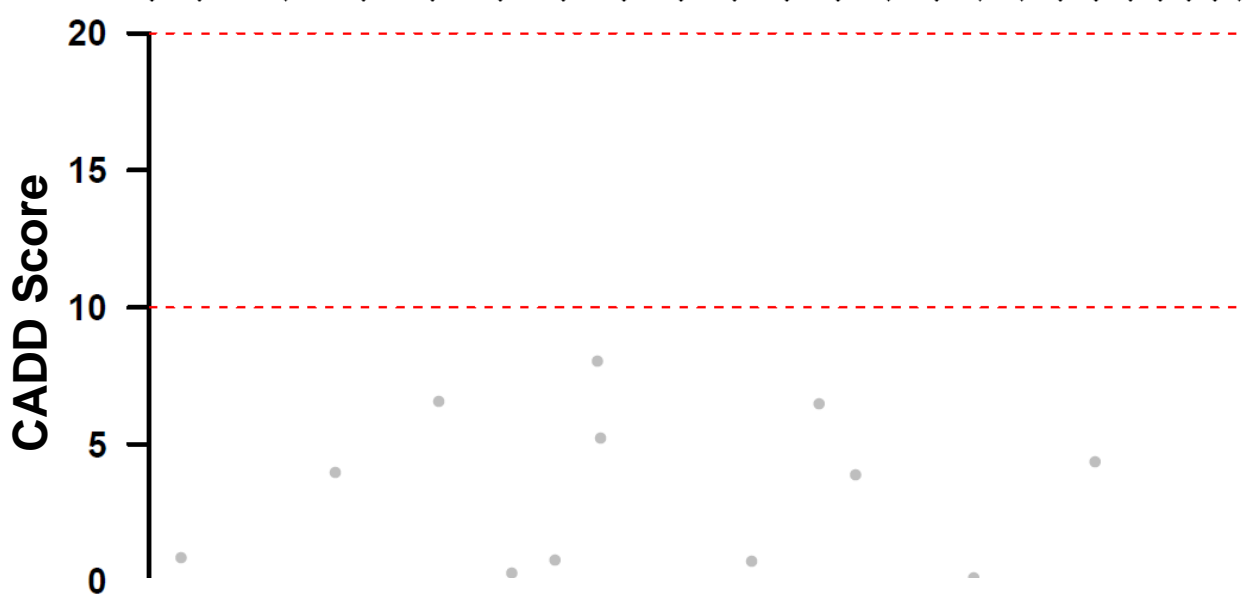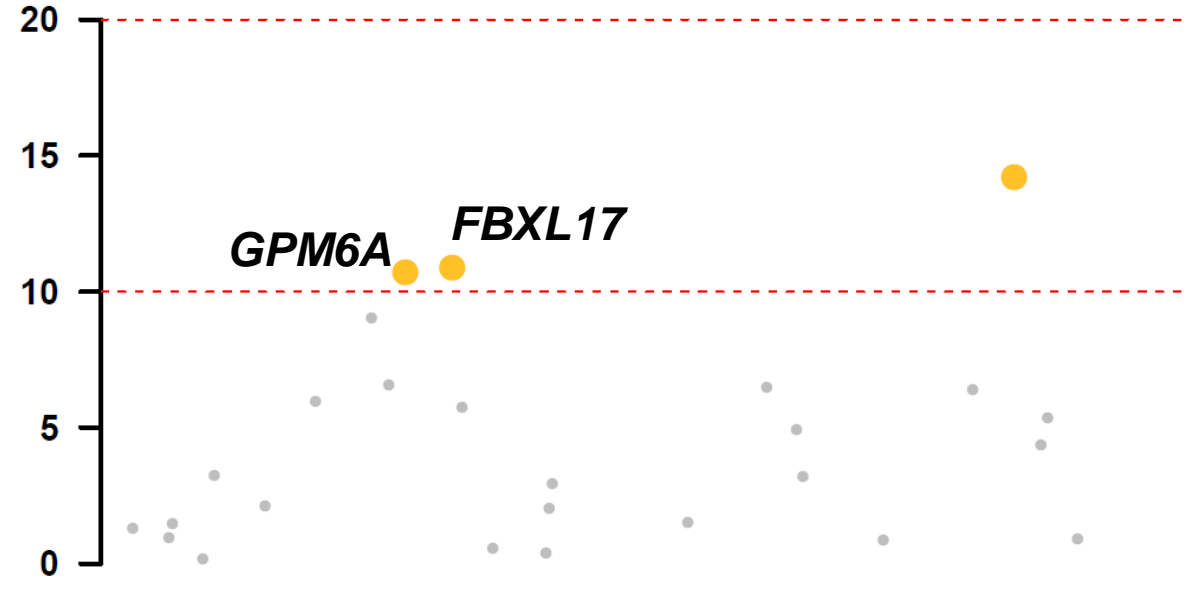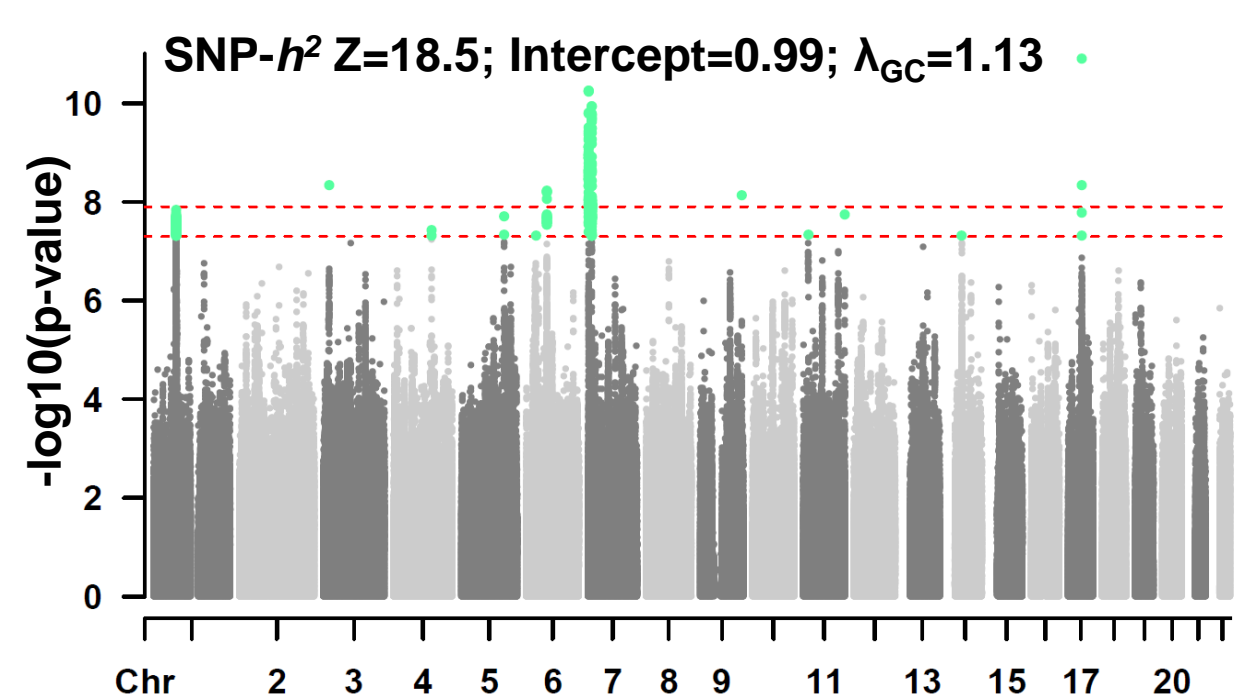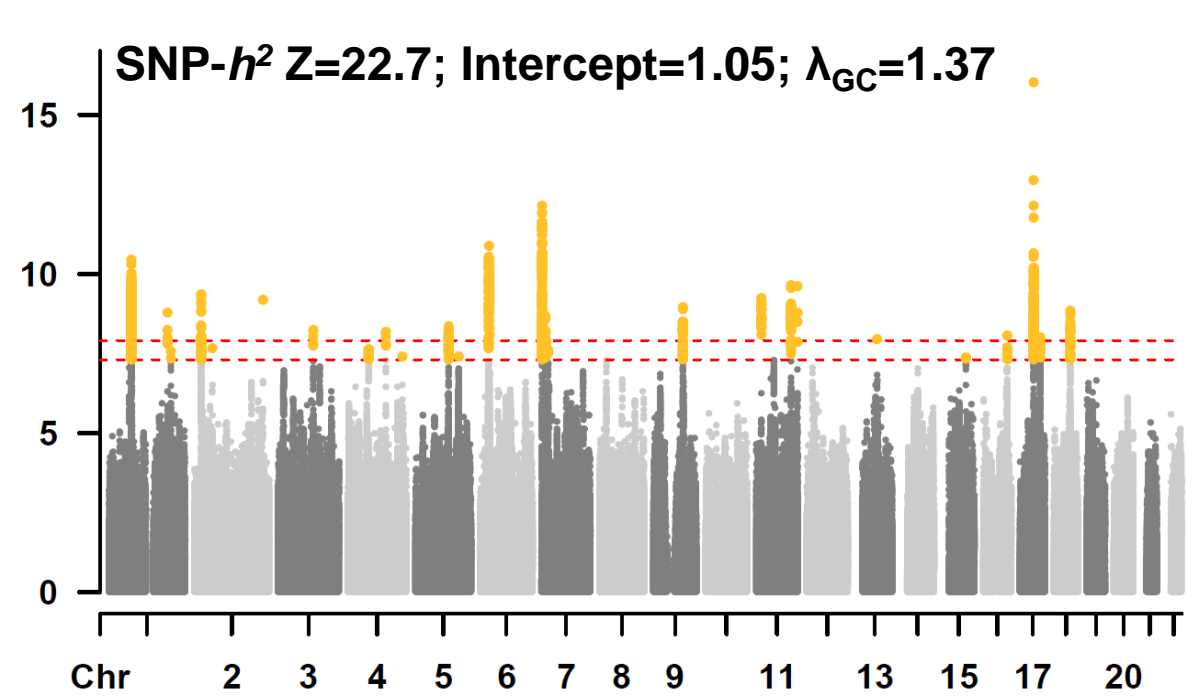

## Summary-Level PRS

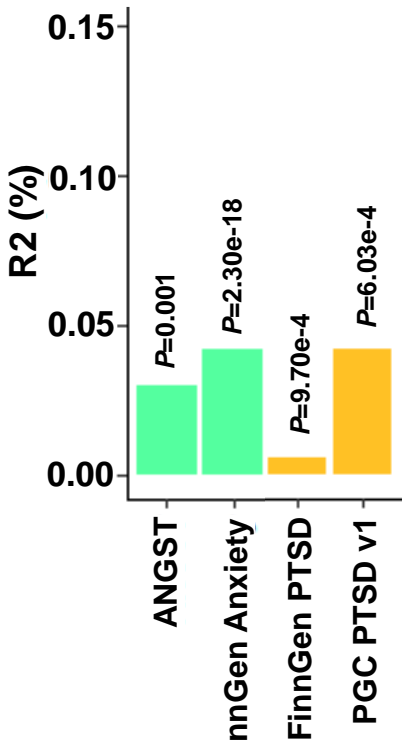

● Anxiety

## Individual-Level PRS

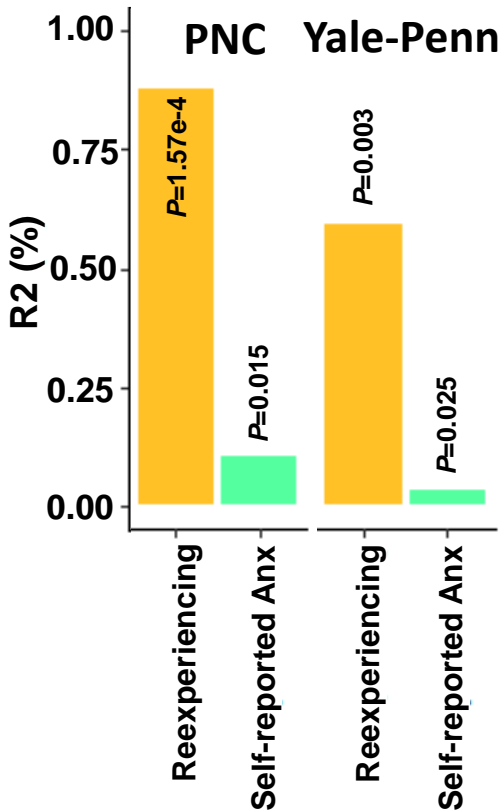

● PTSD

**a Prenatal tissue transcriptomics**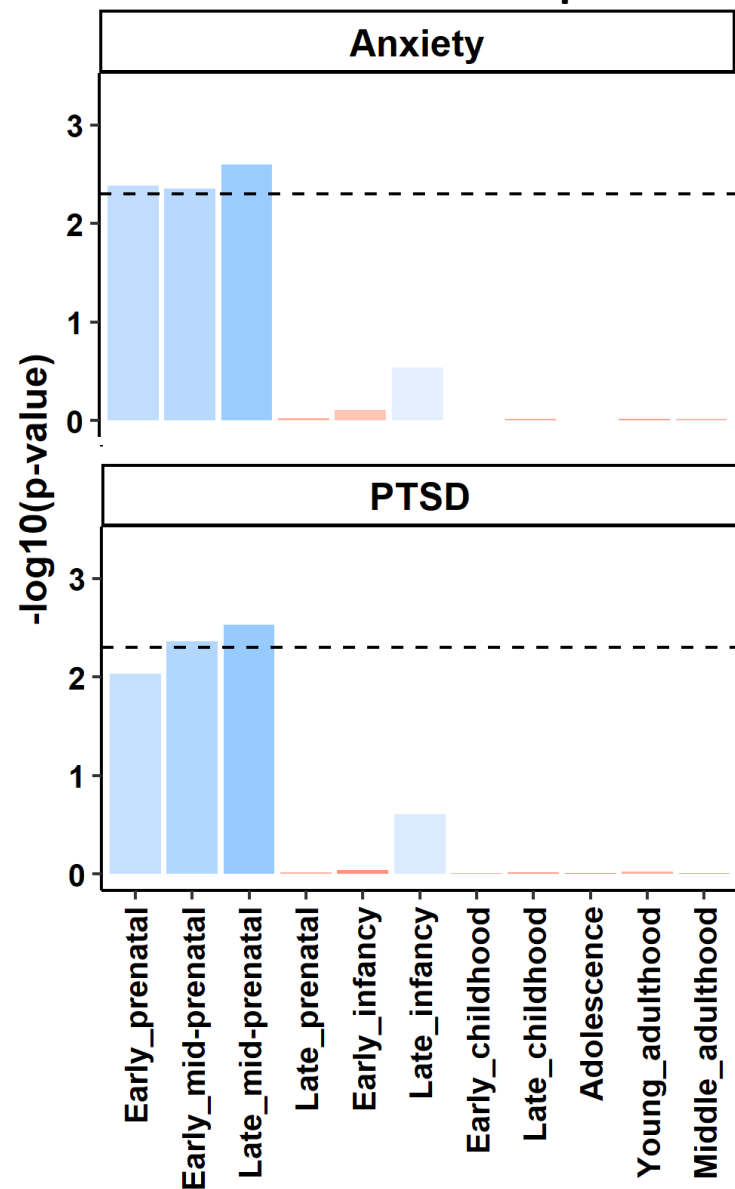**b Fetal 3-D chromatin aware gene-based association**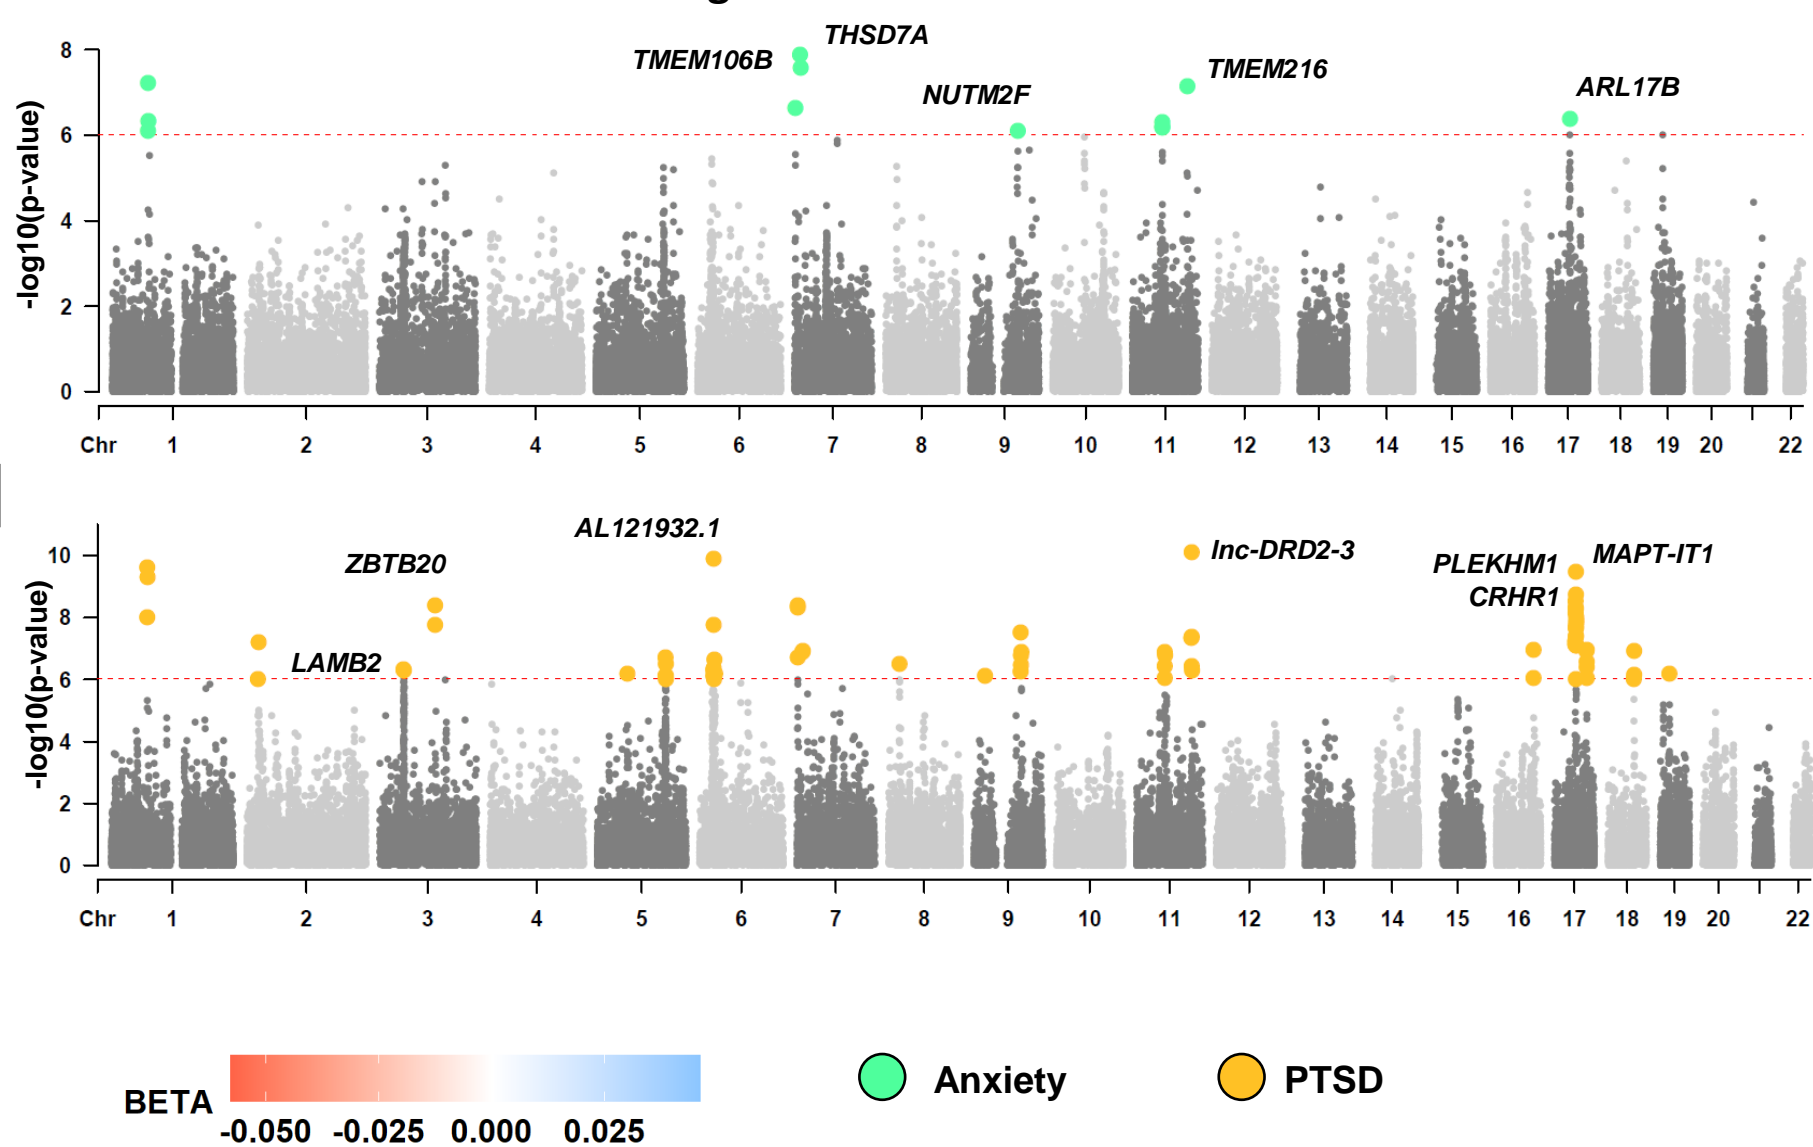

Source: https://medrxiv.org/content/10.1101/2021.07.13.21260369v1.full.pdf
